# DNA profiling reveals *Neobenedenia girellae* as the primary culprit in global fisheries and aquaculture

Alexander K. Brazenor<sup>1,\*</sup>, Terry Bertozzi<sup>2,3</sup>, Terrence L. Miller<sup>4,5</sup>, Ian D. Whittington<sup>3#</sup>, Kate S. Hutson<sup>1</sup>

<sup>1</sup> Marine Parasitology Laboratory, Centre for Sustainable Tropical Fisheries and Aquaculture and the College of Marine and Environmental Sciences, James Cook University, Townsville, Queensland 4811, Australia.

<sup>2</sup> The South Australian Museum, North Terrace, Adelaide, SA 5000, Australia.

<sup>3</sup> School of Biological Sciences, University of Adelaide, Adelaide, SA, 5005, Australia.

<sup>4</sup> Centre for Sustainable Tropical Fisheries and Aquaculture and the College of Marine and Environmental Sciences, James Cook University, Cairns, Queensland 4870, Australia.

<sup>5</sup> Fish Health Laboratory, Department of Fisheries Western Australia, Perth, Western Australia 6151, Australia.

# Deceased 27 October 2014

\*Corresponding author. Tel.: +61 2 6272 3180. E-mail address: [alexander.brazenor@my.jcu.edu.au](mailto:alexander.brazenor@my.jcu.edu.au) (A. K. Brazenor).

## ABSTRACT

Accurate identification of parasite species and strains is crucial to mitigate the risk of epidemics and emerging disease. Species of *Neobenedenia* are harmful monogenean ectoparasites that infect economically important bony fishes in aquaculture worldwide, however, the species boundaries between two of the most notorious taxa, *N. melleni* and *N. girellae*, has been a topic of contention for decades. Historically, identifications of *Neobenedenia* isolates have overwhelmingly been attributed to *N. melleni*, and it has been proposed that *N. girellae* is synonymous with *N. melleni*. We collected 33 *Neobenedenia* isolates from 22 host species

spanning nine countries and amplified three genes including two nuclear (*Histone 3* and *28S rDNA*) and one mitochondrial (*cytochrome b*). Four major clades were identified using Maximum Likelihood and Bayesian inference analyses; clades A-D corresponding to *N. girellae*, *N. melleni*, *N. longiprostata* and *N. pacifica* respectively. All unidentified isolates and the majority of *Neobenedenia* sequences from GenBank fell into clade A. The results of this study indicate that *N. girellae* is a separate species to *N. melleni*, and that a large proportion of previous samples identified as *N. melleni* may be erroneous and a revision of identifications is needed. The large diversity of host species that *N. girellae* is able to infect as determined in this study and the geographic range in which it is present (23.8426° S and 24.1426° N) makes it a globally cosmopolitan species and a threat to aquaculture industries around the world.

Key words: phylogeny, host specificity, Monogenea, Capsalidae, skin fluke, *Neobenedenia melleni*, cryptic

## 1. Introduction

The Monogenea, one of three predominantly parasitic classes in the phylum Platyhelminthes, predominantly comprises ectoparasitic flukes that infect the gills and skin surfaces of marine and freshwater fishes (Whittington, 2004). Monogeneans in the family Capsalidae (Monopisthocotylea) are recognised as virulent pathogens of finfish in sea-cage and semi-open pond aquaculture and are able to multiply rapidly in high-density aquaculture environments as they have a direct, single host life cycle (Jahn and Kuhn, 1932; Ogawa, 1996). Some species are responsible for considerable epidemics (Bauer and Hoffman, 1976; Deveney et

al., 2001; Paperna and Overstreet, 1981; Whittington et al., 2004). According to current taxonomic classification, the Capsalidae comprises nine subfamilies, 57 genera, and over 300 species, most of which are ectoparasitic on marine fishes (Gibson et al., 2010). One of the most notorious of capsalid genera is *Neobenedenia*, Yamaguti 1963, which have a large host range and have been implicated in causing severe pathology and devastating economic losses in aquaculture worldwide.

*Neobenedenia* spp. harm fish by mechanical attachment and subsequent grazing on the epithelial surface of their host, which can cause epidermal degradation, dermal erosion, inflammation and allow the ingress of secondary pathogens (Kaneko et al., 1988; Trujillo-González et al., 2015). *Neobenedenia* currently comprises six species and has gained global attention primarily due to the notoriety of the type species, *Neobenedenia melleni*, MacCallum 1927, which was originally described from tropical fishes held in the New York Aquarium (MacCallum, 1927; Whittington and Horton, 1996). While the origin of the infection is not clear, it is thought that the parasite may have been introduced from the Caribbean through the ornamental fish trade (Dyer et al., 1992; Whittington and Horton, 1996). *Neobenedenia melleni* is infamous as a widespread pathogen in aquaria and aquaculture and the list of recorded host taxa spans over 100 species from 30 families and five orders of teleosts (Bullard et al., 2000; Harris et al., 2004; Whittington and Horton, 1996; Whittington, 2004; Whittington et al., 2004). The broad host specificity reported for *N. melleni* is atypical for monogeneans, where it is considered that approximately 80% of all monogenean species only infect one host species and usually only in a single ocean (Byrnes and Rohde, 1992; Rohde, 1979; Whittington, 1998; Whittington et al., 2000).

Given their specialised lifestyle, it is not surprising that the morphology of species of *Neobenedenia* is highly conserved and accurate identification has proven challenging (Ogawa et al., 1995; Whittington, 2004; Whittington et al., 2004). Of particular controversy and confusion has been the delineation of *N. melleni* and *Neobenedenia girellae*, Hargis, 1955. *Neobenedenia girellae* was originally described by Hargis (1955) infecting opaleye, *Girella nigricans*, Ayres 1860, from California. Twenty-six additional host species have been subsequently reported from a range of localities (Nigrelli, 1947; Bravo-Hollis, 1958; Bravo-Hollis and Deloya, 1973; Gaida and Frost, 1991; Love et al., 1984; Moser and Haldorson, 1982; Ogawa et al., 1995). Twenty years ago, Whittington and Horton (1996) synonymised *N. girellae* with *N. melleni* based on morphology and host specificity. This decision was not unanimously accepted and many authors continue to use '*N. girellae*' in the scientific literature (e.g. Koesharyani et al., 1999; Ogawa et al., 2006; Ogawa and Yokoyama, 1998; Wang et al., 2004; Yoshinaga et al., 2000; Zhang et al., 2014).

Studies employing molecular techniques in systematics have revealed a large number of morphologically similar parasite species that were previously recognized as a single taxon but are actually genetically distinct (Blasco-Costa et al., 2010; Donald et al., 2004; Freeman & Ogawa, 2010; Leung et al., 2009; Miura et al. 2005; Saijuntha et al., 2007; Sepúlveda and González, 2014; Wu et al., 2005; Xiao et al. 2005). For example, Sepúlveda and González (2014) found that a related capsalid species, *Benedenia seriola*, Yamaguti 1934, is in fact a complex of cryptic species and not a single taxon. The first molecular-based evidence suggesting that a species complex may be present among *Neobenedenia* spp. was presented by Whittington et al. (2004) where 28S rDNA sequences were compared between two *Neobenedenia* isolates identified as *N. melleni*. This study indicated that distinct taxa may be present within a complex

of morphologically similar individuals. Since this research, very few molecular studies have addressed *Neobenedenia* taxa in order to resolve the confusion. A brief study comparing *N. melleni* and *N.girellae* by Wang et al. (2004) used short sequences of 28S *rDNA* and indicated that the synonymy of these species proposed by Whittington and Horton (1996) was supported. However, a more comprehensive study by Perkins et al. (2009), which addressed the phylogeny of many capsalid species using multiple genes (28S *rDNA*, *Histone 3*, and *Elongation Factor 1 $\alpha$* ), seems to support the opposite view; that *N. melleni* and *N. girellae* are two separate species.

*Neobenedenia* was first documented in Australian waters in 2000. An outbreak of *N. melleni* was reported in farmed barramundi, *Lates calcarifer*, Bloch 1790, and resulted in the death of over 200,000 fish (Deveney et al., 2001). However, it was only in 2011 that research on *Neobenedenia* in Australia began to develop following the collection of *Neobenedenia* sp. individuals from a fish farm in north Queensland and the subsequent establishment and maintenance of a continuous *in vivo* culture in the Marine Parasitology Laboratory at James Cook University, Australia (Hutson et al., 2012). Morphological identification of the species of *Neobenedenia* in culture has been problematic and all previous research from this laboratory has referred to the parasite as *Neobenedenia* sp. (e.g. Dinh Hoai and Hutson, 2014; Hutson et al., 2012; Trujillo-González et al., 2015a,b). There is a need to accurately identify the species of *Neobenedenia* currently being used as a parasite model in this laboratory so that research can be ascribed to the correct taxon allowing for more meaningful application.

The aim of this study was to use molecular characterisation methods to generate a robust diagnostic and phylogenetic framework for the identification of *Neobenedenia* spp. to underpin our understanding of the ecology of the taxa implicated in causing damage to wild and aquaculture fish stocks worldwide.

## 2. Materials and Methods

### 2.1. Sample collection

*Neobenedenia* specimens were collected between 2000 and 2015 from wild and captive fish in nine countries. The majority of Australian isolates were collected by the authors while many of the international samples were donated by research colleagues (Table 1). Samples were collected by removing live parasites from the skin of their hosts using a scalpel blade or after bathing the host in freshwater, which kills the parasites. Parasites were fixed and stored in 70% analytical grade ethanol.

A slice of tissue (sliver) was removed from the right-hand side margin of individual parasites, opposite the reproductive organs, taking care to avoid the gut. The remainder of the specimen was washed three times using distilled H<sub>2</sub>O and stained with Haematoxylin. Parasites were then dehydrated through an alcohol series, cleared in methyl salicylate or cedarwood oil, and mounted on microscope slides in Canada balsam for further study (Hutson et al., 2012). At least one mounted specimen collected per host by A.K. Brazenor and K.S. Hutson was accessioned into the Queensland Museum helminthology collection. Specimens from the late I.D. Whittington's collection were accessioned to the Australian Helminthological Collection at the South Australian Museum (Table 1).

### 2.2. DNA preparation, PCR amplification, and amplicon sequencing

DNA was extracted from parasite slivers using either the PUREGENE DNA purification system (Gentra Systems) protocol for DNA purification from solid tissue or a QIAgen DNeasy Kit (QIAGEN Inc., Valencia, California, USA) according to the manufacturers' protocols. PCR amplifications of partial *H3*, *28S rDNA*, and *Cytb* sequence were carried out in 25µl reactions using the primers listed in Table 2 and either Amplitaq Gold DNA polymerase, or Phusion high-fidelity polymerase with the following reaction and cycling conditions: Amplitaq Gold – we followed Perkins et al. (2009) except that we standardised the annealing temperature at 55°C and used a maximum of 34 PCR cycles: Phusion - we used a final concentration of 5µL of 5xPhusion® HF buffer, 0.5 µL of 10mM dNTPs, 1.25 µL of each primer (10mM), 0.25 µL of Phusion® Tag DNA polymerase, and 4 µL of DNA template with an initial denaturation step of 98 °C for 30 s, followed by 35 cycles of PCR; denaturation at 98 °C for 10 s, annealing 53-62 °C for 20 s, extension at 72 °C for 30 s, with an additional final extension at 72 °C for 7.5 min. The double-stranded amplification products were visualised on 1.5% agarose gels and purified using a Multiscreen – PCR Plate (Millipore Corporation). Purified products were sent to the Australian Genome Research Facility for cycle-sequencing in both directions using the BigDye Terminator v3.1 cycle-sequencing kit (Applied Biosystems) on an AB3730xl capillary sequencer.

### 2.3. Phylogenetic analyses

Sequence chromatograms were edited with SeqEd 1.0.3 (Applied Biosystems) and aligned using Se-Al2.0a11 (<http://tree.bio.ed.ac.uk/software/seal/>) using inferred amino acid translations (*H3* and *Cytb*) and the predicted *28S rDNA* secondary structure model for *Gyrodactylus salaris*, Malmberg 1957, (Matejusová and Cunningham, 2004). Subsequently, the *28S rDNA* alignment was trimmed to 411bp to remove sequences that could not be aligned

unambiguously and sequences from all three genes concatenated to give a final alignment length of 1409bp. We were unable to amplify all target fragments for some samples and these are coded in the final alignment as “missing data”. All gene sequences have been deposited in GenBank (codes to be added following acceptance of manuscript). PartitionFinder v1.1.1 (Lanfear et al., 2012) was used to partition the data and select the most optimal model of nucleotide substitution for each partition based on the Akaike Information Criterion.

Bayesian phylogenetic analyses were run using the MPI version of MrBayes 3.2.6 (Ronquist et al., 2012) on a 12-core virtual machine on the NeCTAR research cloud under an Ubuntu 16.04 LTS image using Open MPI version 2.0.1 (<https://www.open-mpi.org/>). Analyses employed two runs, each with four chains, with ten million steps, sampling every 1000 steps. The first 20% of sampled topologies was discarded as burn-in based on stability of log likelihood values and that sampled topologies were essentially identical across runs, with standard deviation of split frequencies ~0.01 or less. Samples for numerical parameters were also essentially identical, with variance between versus within runs approaching unity (Ronquist et al., 2012). The majority-rule consensus tree was constructed from the combined post-burn-in samples. Maximum likelihood (ML) analyses was conducted using the RAxML BlackBox server (<http://embnet.vital-it.ch/raxml-bb/>) implementing the methods of Stamatakis et al. (2008). Data were partitioned as recommended by PartitionFinder and run using the Gamma model of rate heterogeneity.

All *Neobenedenia Cytb* and *28S rRNA* sequences on GenBank were downloaded and aligned to our data. We also included the *Cytb* sequence of the only full mitochondrial genome of this genus (JQ038228). A neighbor-joining analysis of the aligned data for each locus was



conducted in MEGA 6.06 (Tamura et al., 2013), using uncorrected *P* distance, in an attempt to reconcile the GenBank sequences with our phylogenetic framework.

### 3. Results

#### 3.1. DNA sequence characteristics

Amplified *Cytb* and *H3* sequences did not contain any premature stop codons or frameshift mutations, contributing 704 and 292 characters respectively to the overall concatenated alignment. Even though we were able to amplify over 800bp of sequence for 28S *rDNA*, the sequence spans a highly variable region which we were unable to unambiguously align, even when using the secondary structure of the 28S *rDNA* sequence for *G. salaris* as a guide. Thus, we were forced to trim our 28S *rDNA* sequences to 411 characters. Some 28S *rDNA* and *H3* sequence chromatograms contained overlapping peaks indicative of heterozygous alleles and these sites were scored with IUPAC ambiguity codes for dimorphic sites. All individuals included in the analyses are represented by sequences of at least two of the genes (*Cytb* and *H3* or 28S *rDNA*).

#### 3.2. Phylogenetic analyses

Analysis of the concatenated dataset in PartitionFinder v1.1.1 suggested that three partitions (*Cytb* codon position 3; *Cytb* codon positions 1 and 2; *H3* codon positions 1, 2 and 3 and 28S *rDNA*) were optimal for the data. PartitionFinder selected the General Time Reversible

(GTR) model with a gamma distribution for rates across sites (GTR + G), GTR + G incorporating a proportion of invariable sites (GTR + I + G) and the Symmetrical model with a gamma distribution for rates across sites (SYM + G) for the partitions respectively.

Bayesian (Fig. 1) and Maximum Likelihood (ML) (Fig. 2) analyses yielded essentially identical topologies, with *Neobenedenia* samples forming a monophyletic clade to the exclusion of the outgroups and separated into four major clades (A-D). The *Neobenedenia* isolate recovered from *Lutjanus argentiventris*, Peters 1869, was the exception and was recovered as part of clade A in the Bayesian analysis (Fig. 1) but as a sister to clade A in the ML analysis (Fig. 2; labelled A\* for clarity) albeit with low bootstrap support (BS 24%).

Samples that comprise clades C and D have been morphologically identified by us (IDW) as *N. longiprostata*, Bravo-Hollis 1971 and *N. pacifica*, Bravo-Hollis 1971, respectively, while samples from both A and B are morphologically '*N. melleni*'. Clade B contains a single specimen collected from *Sphoeroides annulatus*, while clade A contains 28 of the 33 in-group samples (excluding the sample from *L. argentiventris*) included in the study. The isolate currently in culture at the Marine Parasitology Laboratory at James Cook University, Townsville, Australia collected from *Lates calcarifer* (Bowen, Queensland) also fell into clade A

The neighbor-joining tree constructed from all available *Cytb* sequences is presented in Figure 3. Given the proportions of informative sites (Table 3 – Supplementary Material), it is not surprising that the topology is reflective of the Bayesian and ML analyses. Furthermore, the sample collected from *L. argentiventris* is recovered as the sister of the clade A in congruence with the ML analysis (Fig. 2; clade A\*). All of the *Cytb* sequences downloaded from Genbank fall into clade A, except for accession HMM222533 collected from *S. annulatus* (Perkins et al. 2009), which falls into clade B.

Similarly, the neighbor-joining analysis (not shown) from all available 28S *rRNA* sequences also recovered all previously identified clades. The specimen collected from *L. argentiventris* was once again recovered as a separate lineage but clusters with another specimen collected from *Sebastes rubrivinctus*, Jordan and Gilbert 1880, that was part of clade A in all other analyses. Several sequences fell into clade B but all these were sampled from *S. annulatus*.

#### 4. Discussion

The correct identification of species underpins all biological study and for pathogens is critical in understanding infection dynamics, predicting outbreaks and determining effective control strategies. However, in the genus *Neobenedenia*, morphological plasticity, attributed to host induced morphological variation (Whittington and Horton, 1996), failure to accession specimens (including wet and mounted material) to curated collections (e.g. Cowell et al., 1993; Ellis and Watanabe, 1993; Koesharyani et al., 1999; Jahn and Kuhn, 1932; Müeller et al., 1992; Nigrelli and Breder, 1934; Nigrelli, 1935; Nigrelli, 1937; Nigrelli, 1947; Robinson et al., 1992; Zhang et al. 2014) and the lack of a robust genetic framework to aid in identification, has hampered these efforts. This study presents the most comprehensive phylogenetic investigation of *Neobenedenia* spp. to date, incorporating 33 isolates spanning 22 host fish species and nine countries and used both mitochondrial and nuclear gene markers.

Our results clearly show that there is a single species of *Neobenedenia* (Fig 1-3; clade A) that is both widespread geographically, able to infest a large number of different host fishes, and can be found on wild, farmed, and captive fish. Most importantly, clade A does not contain *Neobenedenia* specimens from *Sphoeroides annulatus*, which is likely to be the type host of *N. melleni* according to the description by McCallum (1927) and analysis by Whittington and

Horton (1996). Our sample from *S. annulatus* (Fig 1-3; clade B), which was collected from wild fish in southern Mexico, is well differentiated from clade A and is the sister species to *N. longiprostata* in our analyses. Furthermore, except for HM222533, which was sampled from *S. annulatus* (Perkins et al., 2009) and clusters with our sample in clade B, all other *CytB* sequences obtained from Genbank which are named both *N. melleni* and *N. girellae* all fall in clade A, including the *CytB* sequence from the full mitochondrial genome (JQ038228), which is supposedly *N. melleni* (Zhang et al., 2014). Similarly, all Genbank 28S *rRNA* sequences fall into clade A unless they were sampled from *S. annulatus*, where they clustered with clade B. Thus, the results of the present study support the findings by Whittington et al. (2004) and Perkins et al. (2009) that *N. melleni* and *N. girellae* are cryptic species in that they are morphologically very similar but genetically distinct. In an effort to stabilise the naming of *Neobenedenia* species, it seems prudent to ascribe *N. melleni* to individuals in clade B and retain *N. girellae* for those individuals in clade A.

It is likely that clade A\* (Fig. 2, Fig. 3) represents another species of *Neobenedenia*, however at this stage, it is unclear whether this sample is a previously recorded *Neobenedenia* species or if it is novel to science. The single specimen represented in this clade is the only one collected from a lutjanid host (*Lutjanus argentiventris* collected from La Paz, Mexico) and the assessment of this family of hosts for potential *Neobenedenia* species is an important avenue of research to pursue. The Bayesian placement of this specimen into clade A appears incorrect given the long branch length and ML and neighbor-joining analyses clearly differentiate it from other samples in this study. Further work is underway to assess that status of this individual.

The findings of this study suggest that, historically, both prior and post the proposed synonymy by Whittington and Horton (1996), many of the parasites identified as *N. melleni* may

in fact be *N. girellae* given how few isolates were identified as *N. melleni* in this study (e.g. Bullard et al., 2000; Deveney et al., 2001; Kerber et al., 2011; Landos, 2012; Wang et al., 2004; Zhang et al., 2014). Accurate identification of *Neobenedenia* species may be hampered by intraspecific morphological plasticity thereby resulting in false identifications. Despite the recognised difficulty in differentiating *N. melleni* and *N. girellae*, the majority of studies focussing on *Neobenedenia* spp. have not stated that they have accessioned samples to museum or private collections. This makes clarification of previous identifications almost impossible and accurate identification of historical host species and geographic locations for each of these two taxa unachievable. However, given the number of isolates that were included in this study and the varied host species and locations they were collected from, it is likely that the number of hosts and locations that *N. melleni* has been credited infecting and inhabiting has been overestimated. To facilitate morphological and genetic comparison of individuals in the future, it is recommended to accession reference material (both mounted and fixed specimens).

Using our genetic framework, it will be possible to reassess the morphological differences between *N. girellae* and *N. melleni a posteriori*. The *CytB* neighbor-joining analysis shows significant substructuring in *N. girellae*, which may account for the variable morphology noted by Whittington and Horton (1996). Morphological variation can be due to epigenetic factors which influences the phenotype expressed depending on the particular environment being experienced (Agrawal 2001; Mati et al., 2014; Olstad et al., 2009; Via et al., 1995). The flexibility displayed by these parasites makes the identification of species solely through morphological means considerably challenging (Barcak et al., 2014; Bickford et al., 2006). As closely related cryptic parasite species may exhibit variable traits to one another such as host susceptibility (Reversat et al., 1989), pathogenicity (Haque et al., 2003; Homan and Mank, 2001;

Skovgaard, et al., 2002), and epidemiology (Murrell and Pozio, 2000), accurate identification is crucial to understand the risk posed by the presence of a particular species in a system.

*Neobenedeniagirellae* infects a large number of fish species of economic importance including commercial fisheries, aquaculture, and the ornamental trade (Ogawa et al., 1995; 2006). *Neobenedeniagirellae* isolates were collected from several fish species that support major aquaculture production or commercial fisheries including *Latescalcarifer* (barramundi or Asian sea bass), *Epinepheluscoioides* (gold-spot grouper), *Coryphaenahippurus* (mahi mahi or dolphinfish), *Plectropomusleopardus* (coral trout), *Rachycentroncanadum* (cobia), *Seriolaalandi* (yellowtail kingfish), and *Seriolarivoliana* (almaco jack), Valenciennes 1873 (Fig. 1). Similarly, attractive tropical species are also at risk. Parasites infecting eight species of popular ornamental fish species from seven families were among the isolates included in this study. All represent new host records for *N. girellae* and show the diversity of host species this parasite can infect (Table 1; see 3.1.). Ornamental fish support a huge, multi-national industry that involves hundreds of fish species (and their associated pathogen communities) being transported all around the globe (Bruckner, 2004). This provides an excellent opportunity for the dispersal of *N. girellae*, further encouraged by its lack of host specificity. Surveillance of this pathway for *N. girellae* is advised given its broad host specificity.

Isolates collected from two outbreaks on *L. calcarifer* which occurred in Queensland Australia, the first on a fish farm in Hinchinbrook in 2000 and the second in Gladstone in 2014 were included in this study (Table 1) and were determined to be a part of the *N. girellae* clade (Figure 1-2). The parasites of concern were initially identified as *N. melleni* by Deveney et al. (2001) and Landos (2012), however, our study suggests that these were erroneous identifications and the species associated with these mortality events was in fact *N. girellae*. Similarly, the

previously unidentified species of *Neobenedenia* which is currently being cultured at the Marine Parasitology Laboratory at James Cook University, Townsville has also been identified as *N. girellae* using this analysis. As such, all previous research on this species from the Marine Parasitology Laboratory is now ascribed to *Neobenedenia girellae* (i.e. Brazenor and Hutson 2015; Dinh Hoai and Hutson 2014; Hutson et al. 2012; Militz et al. 2013a; 2013b; Militz and Hutson 2015; Trujillo-Gonzalez et al. 2015a,b).

The large diversity of host species that *N. girellae* is able to infect (23 host species determined from the present study) and the geographic range in which it is present (found between latitudes 23.8489° S and 24.1422° N (wild isolates) and 23.8426° S and 24.1426° N (all isolates) from samples included in this study) makes it a globally cosmopolitan species and a threat to aquaculture industries around the world.

## Acknowledgments

AKB was supported by an Australian Postgraduate Award and funding from the JCU Graduate Research School Research Grants program. Partial funding for this work was provided through a Queensland Government Smart Futures grant to TLM and KSH. This research was supported by use of the Nectar Research Cloud, a collaborative Australian research platform supported by the National Collaborative Research Infrastructure Strategy (NCRIS). Dr Leslie Chisholm, South Australian Museum and Dr Robert Adlard Queensland Museum accessioned specimens. We thank all colleagues who contributed specimens for this research: Roger Chong, Ariel Diamant, Mark Hilder, Noritaka Hirazawa, Thane Militz, Federico Rotman, David Vaughan, Erik Vis, and Roger Williams.

The authors would like to acknowledge Ian Whittington who passed away in October 2014. He was a greatly appreciated colleague and friend and without his enthusiasm of Capsalid research this study would not have been possible. He is deeply missed.

## References

- Agrawal, A.A., 2001. Phenotypic Plasticity in the Interactions and Evolution of Species. *Science* 294, 321–326.
- Barcak, D., Oros, M., Hanzelova, V., Scholz, T., 2014. Phenotypic plasticity in *Caryophyllaeus brachycollis* Janiszewska, 1953 (Cestoda: Caryophyllidae): does fish host play a role? *Syst. Parasitol.* 88, 153–166.
- Bauer, O.N., Hoffman, G.L., 1976. Helminth range extension by translocation of fish. In: Page, L.A. (Ed.), *Wildlife Diseases*, Plenum, New York, pp. 163–172.
- Bickford, D., Lohman, D.J., Sodhi, N.S., Ng, P.K.L., Meier, R., Winker, K., Ingram, K.K., Das, I., 2006. Cryptic species as a window on diversity and conservation. *Trends Ecol. Evol.* 22, 148–155.
- Blasco-Costa, I., Balbuena, J.A., Raga, J.A., Kostadinova, A., Olson, P.D., 2010. Molecules and morphology reveal cryptic variation among digeneans infecting sympatric mullets in the Mediterranean. *Parasitology* 137, 287–302.
- Bravo-Hollis, M., 1958. Trematodes de peces marinos de aguas mexicanas. XIV. Cuarto monogéneos de la familia Capsalidae Baird, 1853, de las costas del Pacífico, incluyendo una especie nueva. *An. Inst. Biol.* 28, 195–216.



367 Bravo-Hollis, M., Deloya, J.C., 1973. Catálogo de la colección helmintológica del Instituto de  
368 Biología. Instituto de Biología Universidad Nacional Autónoma de México 2, 137.

369 Brazenor, A.K., Hutson, K.S., 2015. Effects of temperature and salinity on the life cycle of  
370 *Neobenedenia* sp. (Monogenea: Capsalidae) infecting farmed barramundi (*Lates*  
371 *calcarifer*). Parasitol. Res. 114, 1875–1886.

372 Bullard, S.A., Benz, G.W., Overstreet, R.M., Williams, E.H., Hemdal, J., 2000. Six new host  
373 records and an updated list of wild hosts for *Neobenedenia melleni* (MacCallum)  
374 (Monogenea: Capsalidae). Comp. Parasitol. 67, 190–196.

375 Byrnes, T., Rohde, K., 1992. Geographical distribution and host specificity of ectoparasites of  
376 Australian bream, *Acanthopagrus* spp. (Sparidae). Folia Parasitol. 39, 249–264.

377 Chisholm, L.A., Morgan, J.A.T., Adlard, R.D., Whittington, I.D., 2001. Phylogenetic analysis of  
378 the Monocotylidae (Monogenea) inferred from the 28S rDNA sequences. Int. J. Parasitol.  
379 31, 1253-1263.

380 Colgan, D.J., McLauchlan, A., Wilson, G.D.F., Livingston, S.P., Edgecombe, G.D., Macaranas,  
381 J., Cassis, G., Gray, M.R., 1998. Histone H3 and U2 snRNA DNA sequences and  
382 arthropod molecular evolution. Aust. J. Zool. 46, 419-437.

383 Cowell, L.E., Watanabe, W.O., Head, W.D., Grover, J.J., Shenker, J.M., 1993. Use of tropical  
384 cleaner fish to control the ectoparasite *Neobenedenia melleni* (Monogenea: Capsalidae)  
385 on seawater-cultured Florida red tilapia. Aquaculture 113, 189–200.

386 Deveney, M., Chisholm, L., Whittington, I., 2001. First published record of the pathogenic  
387 monogenean parasite *Neobenedenia melleni* (Capsalidae) from Australia. Dis. Aquat.  
388 Organ. 46, 79–82.

- Dinh Hoai, T., Hutson, K.S., 2014. Reproductive strategies of the insidious fish ectoparasite, *Neobenedenia* sp. (Capsalidae: Monogenea). Plos One 9, 1–7.
- Donald, K.M., Kennedy, M., Poulin, R., Spencer, H.G., 2004. Host specificity and molecular phylogeny of larval Digenea isolated from New Zealand and Australian topshells (Gastropoda: Trochidae). Int. J. Parasitol. 34, 557–568.
- Ellis, E.P., Watanabe, W.O., 1993. The effects of hyposalinity on eggs, juveniles and adults of the marine monogenean, *Neobenedenia melleni* Treatment of ecto-parasitosis in seawater-cultured tilapia. Aquaculture 117, 15–27.
- Freeman M. A., Ogawa K. 2010. Variation in the small subunit ribosomal DNA confirms that *Udonella* (Monogenea: Udonellidae) is a species-rich group. Int. J. Parasitol. 40(2), 255–264.
- Gaida, I.H., Frost, P., 1991. Intensity of *Neobenedenia girellae* (Monogenea: Capsalidae) on the halfmoon, *Medialuna californiensis* (Perciformes: Kyphosidae), examined using a new method for detection. Proceedings of the Helminthological Society of Washington 59, 129–130.
- Gibson, D., Harris, P., Bray, R. (2010). Capsalidae Baird, 1853. Accessed through: World Register of Marine Species at <http://www.marinespecies.org/aphia.php/aphia.php?p=taxdetails&id=119225> on 2016-11-19.
- Hargis, W. J., 1955. A New Species of Benedenia (Trematoda: Monogenea) from *Girella nigricans*, the Opaleye. J. Parasitol. 41(1), 48–50.

410 Harris P. D., Shinn A. P., Cable J., Bakke T. A., 2004. Nominal species of the genus  
411 *Gyrodactylus* von Nordmann 1832 (Monogenea: Gyrodactylidae), with a list of principal  
412 host species. Syst. Parasitol. 59, 1–27.

413 Hutson, K., Mata, L., Paul, N., de Nys, R., 2012. Seaweed extracts as a natural control against  
414 the monogenean ectoparasite, *Neobenedenia* sp., infecting farmed barramundi (*Lates  
415 calcarifer*). Int. J. Parasitol. 42, 1135–1141.

416 Jahn, T.L., Kuhn, L.R., 1932. The life history of *Epibdella melleni*, MacCallum, 1927, a  
417 monogenetic trematode parasitic in marine fishes. Biol. Bull. 62, 89–111.

418 Koesharyani, I., Zafran., Yuasa, K., Hatai, K., 1999. Two Species of Capsalid Monogeneans  
419 Infecting Cultured Humpback Grouper *Cromileptes altivelis* in Indonesia. Fish Pathol.  
420 34, 165–166.

421 Landos, M., 2012. Investigation of the Causes of Aquatic Animal Health Problems in the  
422 Gladstone Harbour and Nearshore Waters. Report commissioned by the Gladstone  
423 Fishing Research Fund, pp. 191.

424 Lanfear, R., Calcott, B., Ho, S., Guindon S., 2012. PartitionFinder: combined selection of  
425 partitioning schemes and substitution models for phylogenetic analyses. Mol. Biol. Evol.  
426 29 (6), 1695–1701.

427 Leung, T.L.F., Keeney, D.B., Poulin, R., 2009. Cryptic species complexes in manipulative  
428 echinostomatid trematodes: when two become six. Parasitology 136, 241–252.

429 Littlewood, D.T.J., Rohde, K., Clough, K.A., 1997. Parasite speciation within or between host  
430 species? Phylogenetic evidence from site-specific polystome monogeneans. Int. J.  
431 Parasitol. 27, 1289–1297.

432 Love, M.S., Shriner, K., Morris, P., 1984. Parasites of olive rockfish, *Sebastes serranoides*  
433 (Scorpaenidae) off central California. Fish. Bull. 82, 530–537.

434 Matejusová, I., Cunningham, C.O., 2004. The First Complete Monogenean Ribosomal RNA  
435 Gene Operon: Sequence and Secondary Structure of the *Gyrodactylus salaris* Malmberg,  
436 1957, Large Subunit Ribosomal RNA Gene. J. Parasitol. 90(1), 146–151.

437 Mati, V.L.T., Freitas, R.M., Bicalho, R.S., Melo, A.L., 2014. Phenotypic plasticity of male  
438 *Schistosoma mansoni* from the peritoneal cavity and hepatic portal system of laboratory  
439 mice and hamsters. J. Helminthol. 29, 294–301.

440 Militz, T.A., Southgate, P.C., Carton, A.G., Hutson, K.S., 2013. Efficacy of garlic (*Allium*  
441 *sativum*) extract applied as a therapeutic immersion treatment for *Neobenedenia* sp.  
442 management in aquaculture. J. Fish Dis. 1–11.

443 Militz, T.A., Southgate, P.C., Carton, A.G., Hutson, K.S., 2013. Dietary supplementation of  
444 garlic (*Allium sativum*) to prevent monogenean infection in aquaculture. Aquaculture  
445 408-409, 95-99.

446 Militz, T.A., Hutson, K.S., 2015. Beyond Symbiosis: Cleaner Shrimp Clean Up in Culture. Plos  
447 One 10(2): e0117723.

448 Miura, O., Kuris, A.M., Torchin, M.E., Hechinger, R.F., Dunham, E.J., Chiba, S., 2005.  
449 Molecular-genetic analyses reveal cryptic species of trematodes in the intertidal  
450 gastropod, *Batillaria cumingi* (Crosse). Int. J. Parasitol. 35, 793–801.

451 Moser, M., Haldorson, L., 1982. Parasites of two species of surfperch (Embiotocidae) from  
452 seven Pacific coast locales. J. Parasitol. 68, 733–735.

453 Müeller, K.W., Watanabe, W.O., Head, W.D., 1992. Effect of Salinity on Hatching in  
 454 *Neobenedenia melleni*, a Monogenean Ectoparasite of Seawater-Cultured Tilapia. Journal  
 455 of the World Aquac. Soc. 23, 199–204.

456 Murrell, K.D., Pozio, E., 2000. Trichinellosis: the zoonosis that won't go quietly. Int. J. Parasitol.  
 457 30, 1339–1349.

458 Nigrelli, R.F., Breder, C.M., 1934. The susceptibility and immunity of certain marine fishes to  
 459 *Epibdella melleni*, a monogenetic trematode. J. Parasitol. 20, 259–269.

460 Nigrelli, R.F., 1935. Studies on the acquired immunity of the pompano, *Trachinotus carolinus*, to  
 461 *Epibdella melleni*. J. Parasitol. 21, 438–439.

462 Nigrelli, R.F., 1937. Further studies on the susceptibility and acquired immunity of marine fishes  
 463 to *Epibdella melleni*, a monogenetic trematode. Zoologica 22, 185–192.

464 Nigrelli, R.F., 1947. Susceptibility and immunity of marine fishes to *Benedenia* (= *Epibdella*)  
 465 *melleni* (MacCallum), a monogenetic trematode. III. Natural hosts in the West Indies. J.  
 466 Parasitol. 33, 25.

467 Ogawa, K., Bondad-Reantaso, M.G., Fukudome, M., Wakabayashi, H., 1995. *Neobenedenia*  
 468 *girellae* (Hargis, 1955) Yamaguti, 1963 (Monogenea: Capsalidae) from Cultured Marine  
 469 Fishes of Japan. J. Parasitol. 81, 223–227.

470 Ogawa, K., 1996. Marine parasitology with special reference to Japanese fisheries and  
 471 mariculture. Vet. Parasitol. 64, 95–105.

472 Ogawa, K., Yokoyama, H., 1998. Parasitic diseases of cultured marine fish in Japan. Fish Pathol.  
 473 33, 303–309.

474 Ogawa, K., 2006. Impacts of diclidophorid monogenean infections on fisheries in Japan. Int. J.  
 475 Parasitol. 32, 373–380.

476 Olstad, K., Bachmann, L., Bakke, T. A., 2009. Phenotypic plasticity of taxonomic and diagnostic  
477 structures in gyrodactylosis-causing flatworms (Monogenea, Platyhelminthes).  
478 Parasitology 136, 1305–1315.

479 Paperna, I., Overstreet, R., 1981. Parasites and diseases of mullets (Mugilidae). In: Oren, O.H.E.  
480 (Ed.), Aquaculture of Grey Mullet, Cambridge University Press, Cambridge, pp. 411–  
481 493.

482 Perkins, E.M., Donnellan, S.C., Bertozzi, T., Chisholm, L.A., Whittington, I.D., 2009. Looks can  
483 deceive: Molecular phylogeny of a family of flatworm ectoparasites (Monogenea:  
484 Capsalidae) does not reflect current morphological classification. Mol. Phylogenet. Evol.  
485 52, 705–714.

486 Robinson, R.D., Khalil, L.F., Hall, R.N., Steele, R.D., 1992. Infection of red hybrid tilapia with a  
487 monogenean in coastal waters off southern Jamaica. Proc. Gulf Caribb. Fish. Inst. 42,  
488 441–447.

489 Rohde, K., 1979. A critical evaluation of intrinsic and extrinsic factors responsible for niche  
490 restriction in parasites. Am. Nat. 114, 648–671.

491 Ronquist, F., Teslenko, M., van der Mark, P., Ayres, D., Darling, A., Höhna, S., Larget, B., Liu,  
492 L., Suchard, M.A. and Huelsenbeck, J.P., 2012. MrBayes 3.2: Efficient Bayesian  
493 phylogenetic inference and model choice across a large model space. Syst. Biol. 61, 539–  
494 542.

495 Saijuntha, W., Sithithaworn, P., Wongkham, S., Laha, T., Pipitgool, V., Tesana, S., Chilton,  
496 N.B., Petney, T.N., Andrews, R.H., 2007. Evidence of a species complex within the food-  
497 borne trematode *Opisthorchis viverrini* and possible co-evolution with their first  
498 intermediate hosts. Int. J. Parasitol. 37, 695–703.

Skovgaard, K., Bødker, L., Rosendahl, S., 2002. Population structure and pathogenicity of members of the *Fusarium oxysporum* complex isolated from soil and root necrosis of pea (*Pisum sativum* L). FEMS Microbiol. Ecol. 42, 367–374.

Stamatakis, A., Hoover, P., Rougemont, J. 2008. A Rapid Bootstrap Algorithm for the RAxML Web-Servers, Syst. Biol. 75(5): 758–771.

Sepúlveda, F.A., González, M.T., 2014. Molecular and morphological analyses reveal that the pathogen *Benedenia seriola* (Monogenea: Capsalidae) is a complex species: Implications for yellowtail *Seriola* spp. aquaculture. Aquaculture 418-419, 94–100.

Tamura, K., Stecher, G., Peterson, D., Filipski, A. and Kumar S., 2013. MEGA6: Molecular Evolutionary Genetics Analysis version 6.0. Mol. Biol. Evol. 30, 2725–2729.

Trujillo-González, A., Johnson, L.K., Constantinoiu, C.C., Hutson, K.S., 2015a. Histopathology associated with haptor attachment of the ectoparasitic monogenean *Neobenedenia* sp. (Capsalidae) to barramundi, *Lates calcarifer* (Bloch). J. Fish Dis. 38(12), 1063–1067.

Trujillo-González, A., Constantinoiu, C.C., Rowe, R., Hutson, K.S., 2015b. Tracing transparent monogenean parasites on fish from infection to maturity. Int. J. Parasitol. 4, 316–322.

Via, S., Gomulkiewicz, R., Jong, G., Scheiner, S.M., Schlichting, C.D., Van Tienderen, P.H., 1995. Adaptive phenotypic plasticity: consensus and controversy. Trends Ecol. Evolut. 10, 212–217.

Wang, J., Zhang, W., Su, Y., Ding, S., 2004. Genetic relationship between *Neobenedenia girellae* and *N. melleni* inferred from 28S rDNA sequences. Acta Oceanol. Sin. 23, 709–716.

Whittington, I., 1998. Diversity "down under": monogeneans in the Antipodes (Australia) with a prediction of monogenean biodiversity worldwide. Int. J. Parasitol. 28, 1481–1493.

- Whittington, I.D., 1996. Benedeniine capsalid monogeneans from Australian fishes: pathogenic species, site-specificity and camouflage. *J. Helminthol.* 70, 177–184.
- Whittington, I.D., Cribb, B.W., Hamwood, T.E., Halliday, J.A., 2000. Host-specificity of monogenean (platyhelminth) parasites: a role for anterior adhesive areas? *Int. J. Parasitol.* 30, 305–320.
- Whittington, I.D., 2004. The Capsalidae (Monogenea: Monopisthocotylea): a review of diversity, classification and phylogeny with a note about species complexes. *Folia Parasitol.* 51, 109–122.
- Whittington, I.D., Deveney, M.R., Morgan, J.A.T., Chisholm, L.A., Adlard, R.D., 2004. A preliminary phylogenetic analysis of the Capsalidae (Platyhelminthes: Monogenea: Monopisthocotylea) inferred from large subunit rDNA sequences. *Parasitology* 128, 511–519.
- Wu, X.Y., Chilton, N.B., Zhu, X.Q., Xie, M.Q., Li, A.X., 2005. Molecular and morphological evidence indicates that *Pseudorhabdosynochus lantauensis* (Monogenea: Diplectanidae) represents two species. *Parasitology* 130, 669–677.
- Xiao, N., Qui, J., Nakao, M., Li, T., Yang, W., Chen, X., Schantz, P.M., Craig, P.S., Ito, A., 2005. *Echinococcus shiquicus* n. sp., a taeniid cestode from Tibetan fox and plateau pika in China. *Int. J. Parasitol.* 35, 693–701.
- Yoshinaga, T., Segawa, I., Kamaishi, T., Sorimachi, M., 2000. Effects of temperature, salinity and chlorine treatment on egg hatching of the monogenean *Neoheterobothrium hirame* infecting Japanese flounder. *Fish Pathol.* 35, 85–88.
- Zhang, J., Wu, X., Li, Y., Zhao, M., Xie, M., Li, A., 2014. The complete mitochondrial genome of *Neobenedenia melleni* (Platyhelminthes: Monogenea): mitochondrial gene content,



545 arrangement and composition compared with two *Benedenia* species. Mol. Biol. Rep. 41,  
546 6583–6589.

Table 1: Host fish species from which *Neobenedenia* were sampled and used for sequencing from Australia and overseas.

| Host species                      | Figure codes | Origin             | Location                                   | Genbank accession codes * |      |      |
|-----------------------------------|--------------|--------------------|--------------------------------------------|---------------------------|------|------|
|                                   |              |                    |                                            | H3                        | 28s  | Cytb |
| <i>Lates calcarifer</i>           | Latcal1      | Wild               | Gladstone, QLD, Australia                  | XXXX                      | XXXX | XXXX |
| <i>Lates calcarifer</i>           | Latcal2      | Captive-Farm       | Bowen, QLD, Australia                      | XXXX                      | XXXX | XXXX |
| <i>Lates calcarifer</i> (2011)    | Latcal3      | Captive-Farm       | Hinchinbrook, QLD, Australia               | XXXX                      | XXXX | XXXX |
| <i>Lates calcarifer</i>           | Latcal4      | Captive-Research   | MARF, Townsville, QLD, Australia           | XXXX                      | XXXX | XXXX |
| <i>Lates calcarifer</i>           | Latcal5      | Captive-Farm       | Singapore                                  | XXXX                      | XXXX | XXXX |
| <i>Lates calcarifer</i> (2000)    | Latcal6      | Captive-Farm       | Hinchinbrook, QLD, Australia               | XXXX                      | XXXX | XXXX |
| <i>Seriola lalandi</i>            | Serlal       | Captive-Farm       | WA, Australia                              | XXXX                      | XXXX | XXXX |
| <i>Trachinotus kennedeyi</i>      | Traken       | Wild               | La Paz, Mexico                             | XXXX                      | XXXX | XXXX |
| <i>Oligoplites altus</i>          | Olialt       | Wild               | La Paz, Mexico                             | XXXX                      | XXXX | XXXX |
| <i>Gnathanodon speciosus</i>      | Gnaspec1     | Wild               | La Paz, Mexico                             | XXXX                      | XXXX | XXXX |
| <i>Gnathanodon speciosus</i>      | Gnaspec2     | Captive-Aquarium   | Durban, South Africa                       | XXXX                      | XXXX | XXXX |
| <i>Seriola rivoliana</i>          | Serriv       | Captive-Farm       | Hawaii, USA                                | XXXX                      | XXXX | XXXX |
| <i>Rachycentron canadum</i>       | Raccan1      | Captive-Research   | MARF, Townsville, QLD, Australia           | XXXX                      | XXXX | XXXX |
| <i>Rachycentron canadum</i>       | Raccan2      | Captive            | Panama                                     | XXXX                      | XXXX | XXXX |
| <i>Rachycentron canadum</i>       | Raccan3      | Captive            | Italy                                      | XXXX                      | XXXX | XXXX |
| <i>Mycteroperca rosacea</i>       | Mycros       | Wild               | La Paz, Mexico                             | XXXX                      | XXXX | XXXX |
| <i>Epinephelus coioides</i>       | Epicoi       | Captive-Research   | Cairns, QLD, Australia                     | XXXX                      | XXXX | XXXX |
| <i>Arothron caeruleopunctatus</i> | Arocae       | Captive-Ornamental | Townsville, QLD, Australia                 | XXXX                      | XXXX | XXXX |
| <i>Canthigaster bennetti</i>      | Canben       | Captive-Ornamental | Townsville, QLD, Australia                 | XXXX                      | XXXX | XXXX |
| <i>Sphoeroides annulatus</i>      | Sphann       | Wild               | La Paz, Mexico                             | XXXX                      | XXXX | XXXX |
| <i>Coryphaena hippurus</i>        | Corhip1      | Captive            | WA, Australia                              | XXXX                      | XXXX | XXXX |
| <i>Coryphaena hippurus</i>        | Corhip2      | Captive-Aquarium   | Durban                                     | XXXX                      | XXXX | XXXX |
| <i>Mugil curema</i>               | Mugcur1      | Wild               | La Paz, Mexico                             | XXXX                      | XXXX | XXXX |
| <i>Mugil curema</i>               | Mugcur       | Wild               | La Paz, Mexico                             | XXXX                      | XXXX | XXXX |
| <i>Nemateleotris decora</i>       | Nemdec       | Captive-Ornamental | Townsville, QLD, Australia                 | XXXX                      | XXXX | XXXX |
| <i>Pseudocheilinus hexataenia</i> | Psehex1      | Captive-Ornamental | Townsville, Q QLD, Australia (June 2012)   | XXXX                      | XXXX | XXXX |
| <i>Pseudocheilinus hexataenia</i> | Psehex2      | Captive-Ornamental | Townsville, QLD, Australia (December 2012) | XXXX                      | XXXX | XXXX |
| <i>Pseudochromis fridmani</i>     | Psefri       | Captive-Ornamental | Townsville, QLD, Australia                 | XXXX                      | XXXX | XXXX |
| <i>Verasper variegatus</i>        | Vervar       | Captive-Farm       | Japan                                      | XXXX                      | XXXX | XXXX |
| <i>Sebastes rubrivinctus</i>      | Sebrub       | Captive-Farm       | USA                                        | XXXX                      | XXXX | XXXX |
| <i>Neocirrhites armatus</i>       | Neoarm       | Captive-Ornamental | Townsville, QLD, Australia                 | XXXX                      | XXXX | XXXX |
| <i>Echeneis naucrates</i>         | Echnau       | Captive-Ornamental | Woods Hole, MS, USA                        | XXXX                      | XXXX | XXXX |
| <i>Sparus aurata</i>              | Spaaur       | -                  | Eilat, Israel                              | XXXX                      | XXXX | XXXX |
| <i>Lutjanus argentiventris</i>    | Lutarg       | Wild               | La Paz, Mexico                             | XXXX                      | XXXX | XXXX |

MARF = Marine Aquaculture Research Facility, James Cook University, Townsville; USA = United States of America, WA = Western Australia; QLD = Queensland, XXXX = Codes forthcoming upon acceptance of manuscript.\* If no code present for a particular gene, it was unable to be sequenced for analysis.

Table 2: Primers used for PCR amplification of *Neobenedenia* spp. isolates.

| Gene            | Primer ID | Sequence (5'-3')         | Forward/Reverse | Source |
|-----------------|-----------|--------------------------|-----------------|--------|
| <i>H3</i>       | G926      | GACCGCYCGYAAAAGYAC       | F               | a      |
|                 | G927      | AGCRTGRATDGCRCACAA       | R               | a      |
|                 | H3aF      | ATGGCTCGTACCAAGCAGACVGC  | F               | b      |
|                 | H3R2      | ATRTCCTTGGGCATGATTGTTAC  | R               | b      |
| <i>28S rDNA</i> | C1        | ACCCGCTGAATTTAAGCAT      | F               | c      |
|                 | D1        | TGGTCCGTGTTTCAAGAC       | R               | c      |
|                 | EC-D2     | CCTTGGTCCGTGTTTCAAGACGGG | R               | d      |
| <i>Cytb</i>     | M1676     | TGAGTTATTATTGATGTAGAGG   | F               | e      |
|                 | M1677     | AAAATATCAKTCAGGCTTWA     | R               | e      |

<sup>a</sup> Perkins et al. (2009); <sup>b</sup> Colgan et al. (1998); <sup>c</sup> Chisholm et al. (2001); <sup>d</sup> Littlewood et al. (1997); <sup>e</sup> present study.

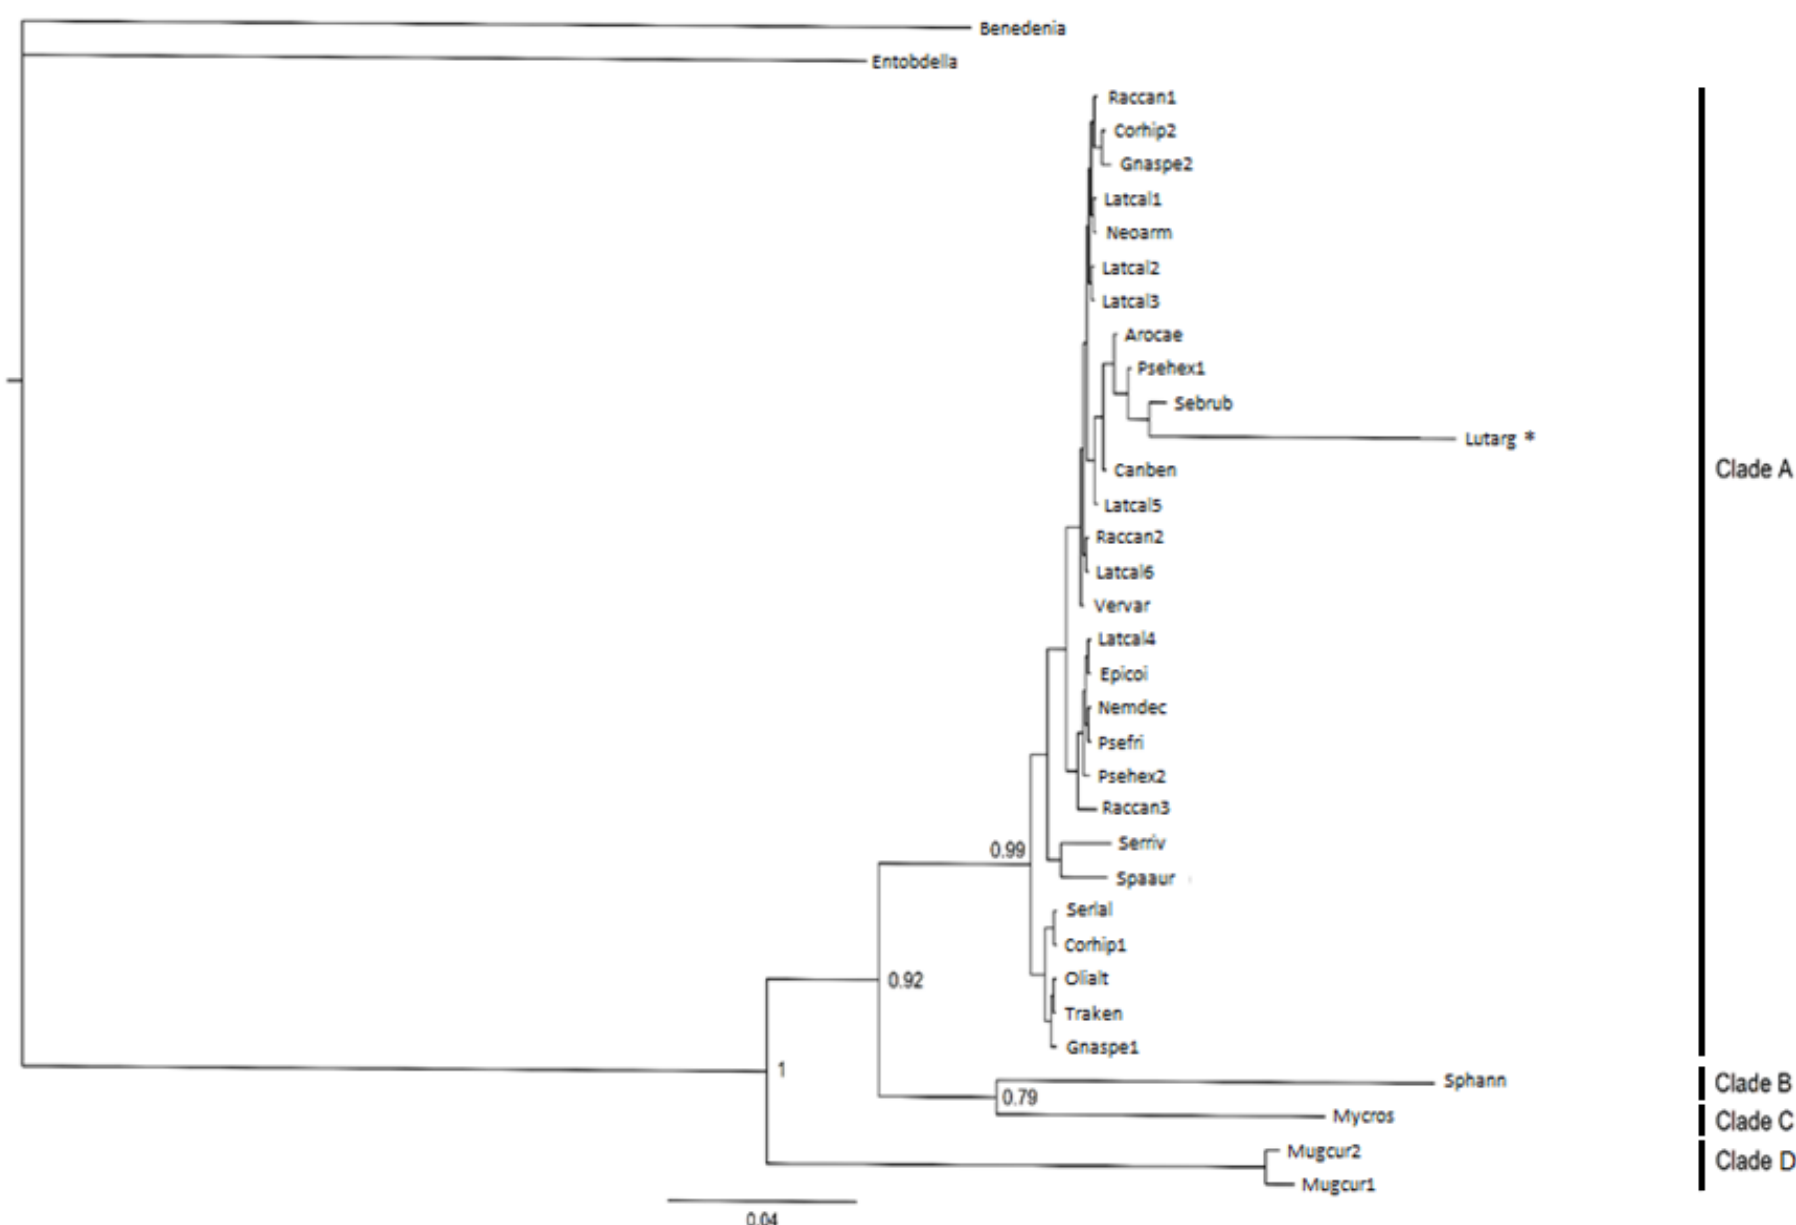

Fig. 1. Relationships of species of *Neobenedenia* isolates collected from wild and captive host fish based on Bayesian inference and maximum likelihood analyses of the *H3*, *28S rDNA*, and *cytochrome b* concatenated dataset. Posterior probability values are next to major nodes. “Benedenia” = *Benedenia seriolae* (HM222526.1 (*Seriola hippos* – South Australia, Australia), AY033941.1 (*Seriola quinqueradiata* – Japan), and FJ972088.1 (*Seriola hippos* – South Australia, Australia)) and “Entobdella” = *Entobdella soleae* (FJ972108.1 (*Solea solea* – United Kingdom), AY486152.1 (*Solea solea* – United Kingdom), HQ684799.1 (unknown host – China)) sequences obtained from Genbank were included as outgroups.

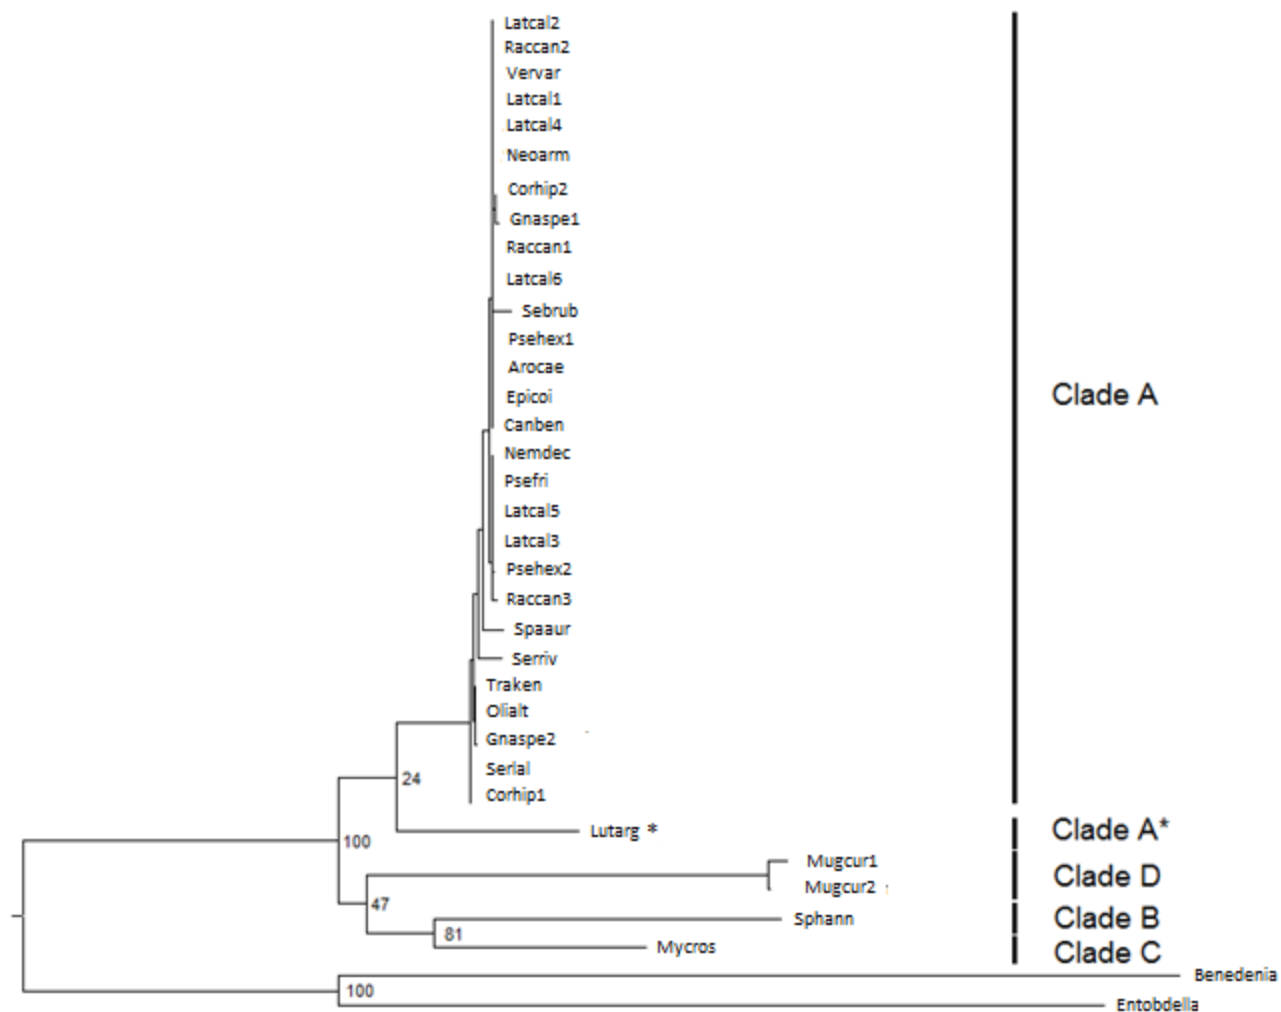

2 Fig. 2. Relationships of species of *Neobenedenia* isolates collected from wild and captive host fish based on Maximum likelihood  
3 analysis of the *H3*, *28S rDNA*, and *cytochrome b* concatenated dataset. Maximum likelihood bootstrap proportions are next to major  
4 nodes. “Benedenia” = *Benedenia seriolae* (HM222526.1 (*Seriola hippos* – South Australia, Australia), AY033941.1 (*Seriola*  
5 *quinqneradiata* – Japan), and FJ972088.1 (*Seriola hippos* – South Australia, Australia)) and “Entobdella” = *Entobdella soleae*  
6 (FJ972108.1 (*Solea solea* – United Kingdom), AY486152.1 (*Solea solea* – United Kingdom), HQ684799.1 (unknown host – China))  
7 sequences obtained from Genbank were included as outgroups. Clades labelled as per the topology of Figure 1. \* indicates the  
8 *Lutjanus argentiventris* sample from Clade A in Figure 1.

9

10

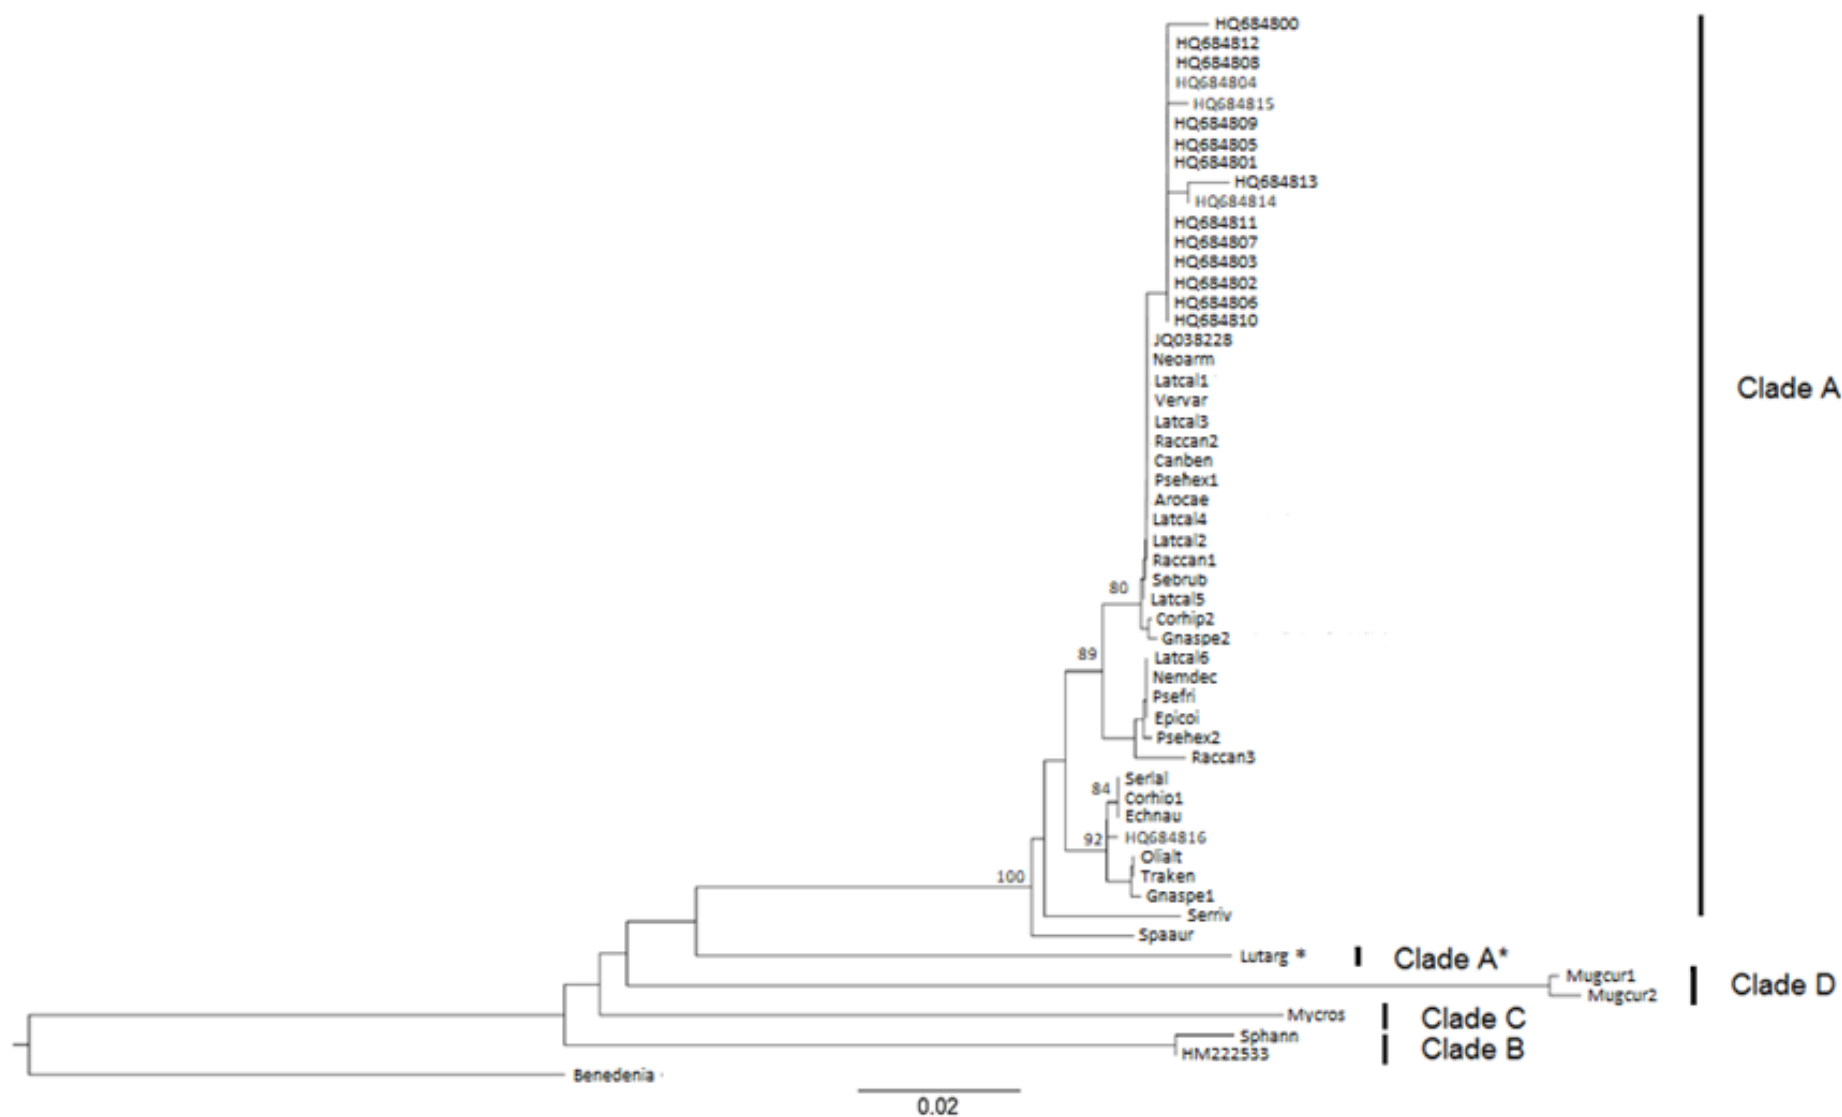

11  
12  
13



14 Fig. 3. Relationships of species of *Neobenedenia* isolates collected from wild and captive host fish based on a Neighbor-joining  
15 analysis of partial *cytochrome b* sequences collected from Genbank and the present study. Genbank samples included in this analysis  
16 are titled using their Genbank identification code and were collected from a variety of host species. “Benedenia” = *Benedenia seriolae*  
17 (FJ972088.1 (*Seriola hippos* – South Australia, Australia)) sequence obtained from Genbank was included as an outgroup. Clades  
18 labelled as per the topology of Figure 1. \* indicates the sample collected from *Lutjanus argentiventris* identified in Clade A in Figure  
19 1.

20 Supplementary Material

21 Table 1: Museum accession numbers for *Neobenedenia* used in this study. XXXX = code forthcoming upon acceptance of the manuscript.

| Host species                      | Figure codes | Museum Accession Code |
|-----------------------------------|--------------|-----------------------|
| <i>Lates calcarifer</i>           | Latcal1      | XXXX                  |
| <i>Lates calcarifer</i>           | Latcal2      | XXXX                  |
| <i>Lates calcarifer</i>           | Latcal3      | XXXX                  |
| <i>Lates calcarifer</i>           | Latcal4      | XXXX                  |
| <i>Lates calcarifer</i>           | Latcal5      | XXXX                  |
| <i>Lates calcarifer</i>           | Latcal6      | XXXX                  |
| <i>Seriola lalandi</i>            | Serlal       | XXXX                  |
| <i>Trachinotus kennedeyi</i>      | Traken       | XXXX                  |
| <i>Oligoplites altus</i>          | Olialt       | XXXX                  |
| <i>Gnathanodon speciosus</i>      | Gnaspec1     | XXXX                  |
| <i>Gnathanodon speciosus</i>      | Gnaspec2     | XXXX                  |
| <i>Seriola rivoliana</i>          | Serriv       | XXXX                  |
| <i>Rachycentron canadum</i>       | Raccan1      | XXXX                  |
| <i>Rachycentron canadum</i>       | Raccan2      | XXXX                  |
| <i>Rachycentron canadum</i>       | Raccan3      | XXXX                  |
| <i>Mycteroperca rosacea</i>       | Mycros       | XXXX                  |
| <i>Epinephelus coioides</i>       | Epicoi       | XXXX                  |
| <i>Arothron caeruleopunctatus</i> | Arocae       | XXXX                  |
| <i>Canthigaster bennetti</i>      | Canben       | XXXX                  |
| <i>Sphoeroides annulatus</i>      | Sphann       | XXXX                  |
| <i>Coryphaena hippurus</i>        | Corhip1      | XXXX                  |
| <i>Coryphaena hippurus</i>        | Corhip2      | XXXX                  |
| <i>Mugil curema</i>               | Mugcur1      | XXXX                  |
| <i>Mugil curema</i>               | Mugcur       | XXXX                  |
| <i>Nemateleotris decora</i>       | Nemdec       | XXXX                  |
| <i>Pseudocheilinus hexataenia</i> | Psehex1      | XXXX                  |
| <i>Pseudocheilinus hexataenia</i> | Psehex2      | XXXX                  |
| <i>Pseudochromis fridmani</i>     | Psefri       | XXXX                  |
| <i>Verasper variegatus</i>        | Vervar       | XXXX                  |
| <i>Sebastes rubrivinctus</i>      | Sebrub       | XXXX                  |
| <i>Neocirrhites armatus</i>       | Neoarm       | XXXX                  |
| <i>Echeneis naucrates</i>         | Echnau       | XXXX                  |
| <i>Sparus aurata</i>              | Spaur        | XXXX                  |
| <i>Lutjanus argentiventris</i>    | Lutarg       | XXXX                  |

23 Table 2: Sequences of *Neobenedenia* (identified as “*Neobenedenia melleni*” by researchers) retrieved from Genbank, the lodging  
 24 researchers and associated codes

| Genbank code | Species                     | Host species/species code    | Collection location     | Gene                           | Reference authors                                              |
|--------------|-----------------------------|------------------------------|-------------------------|--------------------------------|----------------------------------------------------------------|
| HQ684800     | <i>Neobenedenia melleni</i> | LsaHZ3                       | China                   | Mitochondrial - Cytochrome b   | Zhang,J., Wu,X.Y., Xie,M.Q.. and Li,A.X.                       |
| HQ684801     | <i>Neobenedenia melleni</i> | SduXM                        | China                   | Mitochondrial - Cytochrome b   | Zhang,J., Wu,X.Y., Xie,M.Q.. and Li,A.X.                       |
| HQ684802     | <i>Neobenedenia melleni</i> | ClIGZ2                       | China                   | Mitochondrial - Cytochrome b   | Zhang,J., Wu,X.Y., Xie,M.Q.. and Li,A.X.                       |
| HQ684803     | <i>Neobenedenia melleni</i> | EcoZJ1                       | China                   | Mitochondrial - Cytochrome b   | Zhang,J., Wu,X.Y., Xie,M.Q.. and Li,A.X.                       |
| HQ684805     | <i>Neobenedenia melleni</i> | EchZH                        | China                   | Mitochondrial - Cytochrome b   | Zhang,J., Wu,X.Y., Xie,M.Q.. and Li,A.X.                       |
| HQ684806     | <i>Neobenedenia melleni</i> | LarYJ                        | China                   | Mitochondrial - Cytochrome b   | Zhang,J., Wu,X.Y., Xie,M.Q.. and Li,A.X.                       |
| HQ684807     | <i>Neobenedenia melleni</i> | LstYJ1                       | China                   | Mitochondrial - Cytochrome b   | Zhang,J., Wu,X.Y., Xie,M.Q.. and Li,A.X.                       |
| HQ684808     | <i>Neobenedenia melleni</i> | SduZH2                       | China                   | Mitochondrial - Cytochrome b   | Zhang,J., Wu,X.Y., Xie,M.Q.. and Li,A.X.                       |
| HQ684809     | <i>Neobenedenia melleni</i> | SduZH1                       | China                   | Mitochondrial - Cytochrome b   | Zhang,J., Wu,X.Y., Xie,M.Q.. and Li,A.X.                       |
| HQ684810     | <i>Neobenedenia melleni</i> | LsaZJ1                       | China                   | Mitochondrial - Cytochrome b   | Zhang,J., Wu,X.Y., Xie,M.Q.. and Li,A.X.                       |
| HQ684811     | <i>Neobenedenia melleni</i> | ClIGZ1                       | China                   | Mitochondrial - Cytochrome b   | Zhang,J., Wu,X.Y., Xie,M.Q.. and Li,A.X.                       |
| HQ684812     | <i>Neobenedenia melleni</i> | PciYJ1                       | China                   | Mitochondrial - Cytochrome b   | Zhang,J., Wu,X.Y., Xie,M.Q.. and Li,A.X.                       |
| HQ684813     | <i>Neobenedenia melleni</i> | TblHD1                       | China                   | Mitochondrial - Cytochrome b   | Zhang,J., Wu,X.Y., Xie,M.Q.. and Li,A.X.                       |
| HQ684814     | <i>Neobenedenia melleni</i> | PciZJ2                       | China                   | Mitochondrial - Cytochrome b   | Zhang,J., Wu,X.Y., Xie,M.Q.. and Li,A.X.                       |
| HQ684815     | <i>Neobenedenia melleni</i> | EmoJAP1                      | China                   | Mitochondrial - Cytochrome b   | Zhang,J., Wu,X.Y., Xie,M.Q.. and Li,A.X.                       |
| HQ684816     | <i>Neobenedenia melleni</i> | EmoJAP2                      | China                   | Mitochondrial - Cytochrome b   | Zhang,J., Wu,X.Y., Xie,M.Q.. and Li,A.X.                       |
| JQ038228     | <i>Neobenedenia melleni</i> | <i>Seriola dumerili</i>      | China – Fujian Province | Mitochondrial – partial genome | Zhang,J., Wu,X.Y., Xie,M.Q.. and Li,A.X.                       |
| HM222533     | <i>Neobenedenia</i> sp.     | <i>Sphoeroides annulatus</i> | Mexico – La Paz         | Mitochondrial - Cytochrome b   | Perkins,E.M., Donnellan,S.C., Bertozzi,T. and Whittington,I.D. |

28    Table 3: Proportion of informative sites of three genes; 28S, H3, and cytochrome b for sequences included in analyses.

| Gene         | Length | Parsimony informative sites |
|--------------|--------|-----------------------------|
| 28S          | 411    | 24                          |
| H3           | 292    | 26                          |
| Cytochrome b | 704    | 166                         |
