# 1 DNA profiling reveals *Neobenedenia girellae* as the primary culprit in 2 global fisheries and aquaculture

3

4 Alexander K. Brazenor<sup>1,\*</sup>, Terry Bertozzi<sup>2,3</sup>, Terrence L. Miller<sup>4,5</sup>, Ian D. Whittington<sup>3#</sup>, Kate S.  
5 Hutson<sup>1</sup>

6 <sup>1</sup> Marine Parasitology Laboratory, Centre for Sustainable Tropical Fisheries and Aquaculture and the College of Marine and  
7 Environmental Sciences, James Cook University, Townsville, Queensland 4811, Australia.

8 <sup>2</sup> The South Australian Museum, North Terrace, Adelaide, SA 5000, Australia.

9 <sup>3</sup> School of Biological Sciences, University of Adelaide, Adelaide, SA, 5005, Australia.

10 <sup>4</sup> Centre for Sustainable Tropical Fisheries and Aquaculture and the College of Marine and Environmental Sciences, James Cook  
11 University, Cairns, Queensland 4870, Australia.

12 <sup>5</sup> Fish Health Laboratory, Department of Fisheries Western Australia, Perth, Western Australia 6151, Australia.

13 # Deceased 27 October 2014

14

15 \*Corresponding author. Tel.: +61 2 6272 3180. E-mail address: [alexander.brazenor@my.jcu.edu.au](mailto:alexander.brazenor@my.jcu.edu.au) (A.  
16 K. Brazenor).

17

## 18 ABSTRACT

19 Accurate identification of parasite species and strains is crucial to mitigate the risk of epidemics  
20 and emerging disease. Species of *Neobenedenia* are harmful monogenean ectoparasites that  
21 infect economically important bony fishes in aquaculture worldwide, however, the species  
22 boundaries between two of the most notorious taxa, *N. melleni* and *N. girellae*, has been a topic  
23 of contention for decades. Historically, identifications of *Neobenedenia* isolates have  
24 overwhelmingly been attributed to *N. melleni*, and it has been proposed that *N. girellae* is  
25 synonymous with *N. melleni*. We collected 33 *Neobenedenia* isolates from 22 host species

26 spanning nine countries and amplified three genes including two nuclear (*Histone 3* and *28S*  
27 *rDNA*) and one mitochondrial (*cytochrome b*). Four major clades were identified using  
28 Maximum Likelihood and Bayesian inference analyses; clades A-D corresponding to *N. girellae*,  
29 *N. melleni*, *N. longiprostata* and *N. pacifica* respectively. All unidentified isolates and the  
30 majority of *Neobenedenia* sequences from GenBank fell into clade A. The results of this study  
31 indicate that *N. girellae* is a separate species to *N. melleni*, and that a large proportion of previous  
32 samples identified as *N. melleni* may be erroneous and a revision of identifications is needed.  
33 The large diversity of host species that *N. girellae* is able to infect as determined in this study  
34 and the geographic range in which it is present (23.8426° S and 24.1426° N) makes it a globally  
35 cosmopolitan species and a threat to aquaculture industries around the world.

36

37 Key words: phylogeny, host specificity, Monogenea, Capsalidae, skin fluke, *Neobenedenia*  
38 *melleni*, cryptic

39

## 40 **1. Introduction**

41

42 The Monogenea, one of three predominantly parasitic classes in the phylum  
43 Platyhelminthes, predominantly comprises ectoparasitic flukes that infect the gills and skin  
44 surfaces of marine and freshwater fishes (Whittington, 2004). Monogeneans in the family  
45 Capsalidae (Monopisthocotylea) are recognised as virulent pathogens of finfish in sea-cage and  
46 semi-open pond aquaculture and are able to multiply rapidly in high-density aquaculture  
47 environments as they have a direct, single host life cycle (Jahn and Kuhn, 1932; Ogawa, 1996).  
48 Some species are responsible for considerable epidemics (Bauer and Hoffman, 1976; Deveney et

49 al., 2001; Paperna and Overstreet, 1981; Whittington et al., 2004). According to current  
50 taxonomic classification, the Capsalidae comprises nine subfamilies, 57 genera, and over 300  
51 species, most of which are ectoparasitic on marine fishes (Gibson et al., 2010). One of the most  
52 notorious of capsalid genera is *Neobenedenia*, Yamaguti 1963, which have a large host range and  
53 have been implicated in causing severe pathology and devastating economic losses in  
54 aquaculture worldwide.

55 *Neobenedenia* spp. harm fish by mechanical attachment and subsequent grazing on the  
56 epithelial surface of their host, which can cause epidermal degradation, dermal erosion,  
57 inflammation and allow the ingress of secondary pathogens (Kaneko et al., 1988; Trujillo-  
58 González et al., 2015). *Neobenedenia* currently comprises six species and has gained global  
59 attention primarily due to the notoriety of the type species, *Neobenedenia melleni*, MacCallum  
60 1927, which was originally described from tropical fishes held in the New York Aquarium  
61 (MacCallum, 1927; Whittington and Horton, 1996). While the origin of the infection is not clear,  
62 it is thought that the parasite may have been introduced from the Caribbean through the  
63 ornamental fish trade (Dyer et al., 1992; Whittington and Horton, 1996). *Neobenedenia melleni*  
64 is infamous as a widespread pathogen in aquaria and aquaculture and the list of recorded host  
65 taxa spans over 100 species from 30 families and five orders of teleosts (Bullard et al., 2000;  
66 Harris et al., 2004; Whittington and Horton, 1996; Whittington, 2004; Whittington et al., 2004).  
67 The broad host specificity reported for *N. melleni* is atypical for monogeneans, where it is  
68 considered that approximately 80% of all monogenean species only infect one host species and  
69 usually only in a single ocean (Byrnes and Rohde, 1992; Rohde, 1979; Whittington, 1998;  
70 Whittington et al., 2000).

71           Given their specialised lifestyle, it is not surprising that the morphology of species of  
72 *Neobenedenia* is highly conserved and accurate identification has proven challenging (Ogawa et  
73 al., 1995; Whittington, 2004; Whittington et al., 2004). Of particular controversy and confusion  
74 has been the delineation of *N. melleni* and *Neobenedenia girellae*, Hargis, 1955. *Neobenedenia*  
75 *girellae* was originally described by Hargis (1955) infecting opaleye, *Girella nigricans*, Ayres  
76 1860, from California. Twenty-six additional host species have been subsequently reported from  
77 a range of localities (Nigrelli, 1947; Bravo-Hollis, 1958; Bravo-Hollis and Deloya, 1973; Gaida  
78 and Frost, 1991; Love et al., 1984; Moser and Haldorson, 1982; Ogawa et al., 1995). Twenty  
79 years ago, Whittington and Horton (1996) synonymised *N. girellae* with *N. melleni* based on  
80 morphology and host specificity. This decision was not unanimously accepted and many authors  
81 continue to use '*N. girellae*' in the scientific literature (e.g. Koesharyani et al., 1999; Ogawa et  
82 al., 2006; Ogawa and Yokoyama, 1998; Wang et al., 2004; Yoshinaga et al., 2000; Zhang et al.,  
83 2014).

84           Studies employing molecular techniques in systematics have revealed a large number of  
85 morphologically similar parasite species that were previously recognized as a single taxon but  
86 are actually genetically distinct (Blasco-Costa et al., 2010; Donald et al., 2004; Freeman &  
87 Ogawa, 2010; Leung et al., 2009; Miura et al. 2005; Saijuntha et al., 2007; Sepúlveda and  
88 González, 2014; Wu et al., 2005; Xiao et al. 2005). For example, Sepúlveda and González  
89 (2014) found that a related capsalid species, *Benedenia seriolae*, Yamaguti 1934, is in fact a  
90 complex of cryptic species and not a single taxon. The first molecular-based evidence suggesting  
91 that a species complex may be present among *Neobenedenia* spp. was presented by Whittington  
92 et al. (2004) where 28S rDNA sequences were compared between two *Neobenedenia* isolates  
93 identified as *N. melleni*. This study indicated that distinct taxa may be present within a complex

94 of morphologically similar individuals. Since this research, very few molecular studies have  
95 addressed *Neobenedenia* taxa in order to resolve the confusion. A brief study comparing *N.*  
96 *melleni* and *N.girellae* by Wang et al. (2004) used short sequences of 28S *rDNA* and indicated  
97 that the synonymy of these species proposed by Whittington and Horton (1996) was supported.  
98 However, a more comprehensive study by Perkins et al. (2009), which addressed the phylogeny  
99 of many capsalid species using multiple genes (28S *rDNA*, *Histone 3*, and *Elongation Factor*  
100 *1 $\alpha$* ), seems to support the opposite view; that *N. melleni* and *N. girellae* are two separate species.

101 *Neobenedenia* was first documented in Australian waters in 2000. An outbreak of *N.*  
102 *melleni* was reported in farmed barramundi, *Lates calcarifer*, Bloch 1790, and resulted in the  
103 death of over 200,000 fish (Deveney et al., 2001). However, it was only in 2011 that research on  
104 *Neobenedenia* in Australia began to develop following the collection of *Neobenedenia* sp.  
105 individuals from a fish farm in north Queensland and the subsequent establishment and  
106 maintenance of a continuous *in vivo* culture in the Marine Parasitology Laboratory at James  
107 Cook University, Australia (Hutson et al., 2012). Morphological identification of the species of  
108 *Neobenedenia* in culture has been problematic and all previous research from this laboratory has  
109 referred to the parasite as *Neobenedenia* sp. (e.g. Dinh Hoai and Hutson, 2014; Hutson et al.,  
110 2012; Trujillo-González et al., 2015a,b). There is a need to accurately identify the species of  
111 *Neobenedenia* currently being used as a parasite model in this laboratory so that research can be  
112 ascribed to the correct taxon allowing for more meaningful application.

113 The aim of this study was to use molecular characterisation methods to generate a robust  
114 diagnostic and phylogenetic framework for the identification of *Neobenedenia* spp. to underpin  
115 our understanding of the ecology of the taxa implicated in causing damage to wild and  
116 aquaculture fish stocks worldwide.

117

## 118 **2. Materials and Methods**

119

### 120 *2.1. Sample collection*

121

122 *Neobenedenia* specimens were collected between 2000 and 2015 from wild and captive  
123 fish in nine countries. The majority of Australian isolates were collected by the authors while  
124 many of the international samples were donated by research colleagues (Table 1). Samples were  
125 collected by removing live parasites from the skin of their hosts using a scalpel blade or after  
126 bathing the host in freshwater, which kills the parasites. Parasites were fixed and stored in 70%  
127 analytical grade ethanol.

128

129 A slice of tissue (sliver) was removed from the right-hand side margin of individual  
130 parasites, opposite the reproductive organs, taking care to avoid the gut. The remainder of the  
131 specimen was washed three times using distilled H<sub>2</sub>O and stained with Haematoxylin. Parasites  
132 were then dehydrated through an alcohol series, cleared in methyl salicylate or cedarwood oil,  
133 and mounted on microscope slides in Canada balsam for further study (Hutson et al., 2012). At  
134 least one mounted specimen collected per host by A.K. Brazenor and K.S. Hutson was  
135 accessioned into the Queensland Museum helminthology collection. Specimens from the late  
136 I.D. Whittington's collection were accessioned to the Australian Helminthological Collection at  
137 the South Australian Museum (Table 1).

137

### 138 *2.2. DNA preparation, PCR amplification, and amplicon sequencing*

139

140 DNA was extracted from parasite slivers using either the PUREGENE DNA purification  
141 system (Gentra Systems) protocol for DNA purification from solid tissue or a QIAGEN DNeasy  
142 Kit (QIAGEN Inc., Valencia, California, USA) according to the manufacturers' protocols. PCR  
143 amplifications of partial *H3*, *28S rDNA*, and *Cytb* sequence were carried out in 25µl reactions  
144 using the primers listed in Table 2 and either Amplitaq Gold DNA polymerase, or Phusion high-  
145 fidelity polymerase with the following reaction and cycling conditions: Amplitaq Gold – we  
146 followed Perkins et al. (2009) except that we standardised the annealing temperature at 55°C and  
147 used a maximum of 34 PCR cycles: Phusion - we used a final concentration of 5µL of  
148 5xPhusion® HF buffer, 0.5 µL of 10mM dNTPs, 1.25 µL of each primer (10mM), 0.25 µL of  
149 Phusion® Tag DNA polymerase, and 4 µL of DNA template with an initial denaturation step of  
150 98 °C for 30 s, followed by 35 cycles of PCR; denaturation at 98 °C for 10 s, annealing 53-62 °C  
151 for 20 s, extension at 72 °C for 30 s, with an additional final extension at 72 °C for 7.5 min. The  
152 double-stranded amplification products were visualised on 1.5% agarose gels and purified using  
153 a Multiscreen – PCR Plate (Millipore Corporation). Purified products were sent to the Australian  
154 Genome Research Facility for cycle-sequencing in both directions using the BigDye Terminator  
155 v3.1 cycle-sequencing kit (Applied Biosystems) on an AB3730xl capillary sequencer.

156

### 157 *2.3. Phylogenetic analyses*

158 Sequence chromatograms were edited with SeqEd 1.0.3 (Applied Biosystems) and  
159 aligned using Se-AI2.0a11 (<http://tree.bio.ed.ac.uk/software/seal/>) using inferred amino acid  
160 translations (*H3* and *Cytb*) and the predicted *28S rDNA* secondary structure model for  
161 *Gyrodactylus salaris*, Malmberg 1957, (Matejusová and Cunningham, 2004). Subsequently, the  
162 *28S rDNA* alignment was trimmed to 411bp to remove sequences that could not be aligned

163 unambiguously and sequences from all three genes concatenated to give a final alignment length  
164 of 1409bp. We were unable to amplify all target fragments for some samples and these are coded  
165 in the final alignment as “missing data”. All gene sequences have been deposited in GenBank  
166 (codes to be added following acceptance of manuscript). PartitionFinder v1.1.1 (Lanfear et al.,  
167 2012) was used to partition the data and select the most optimal model of nucleotide substitution  
168 for each partition based on the Akaike Information Criterion.

169 Bayesian phylogenetic analyses were run using the MPI version of MrBayes 3.2.6  
170 (Ronquist et al., 2012) on a 12-core virtual machine on the NeCTAR research cloud under an  
171 Ubuntu 16.04 LTS image using Open MPI version 2.0.1 (<https://www.open-mpi.org/>). Analyses  
172 employed two runs, each with four chains, with ten million steps, sampling every 1000 steps.  
173 The first 20% of sampled topologies was discarded as burn-in based on stability of log likelihood  
174 values and that sampled topologies were essentially identical across runs, with standard deviation  
175 of split frequencies ~0.01 or less. Samples for numerical parameters were also essentially  
176 identical, with variance between versus within runs approaching unity (Ronquist et al., 2012).  
177 The majority-rule consensus tree was constructed from the combined post-burn-in samples.  
178 Maximum likelihood (ML) analyses was conducted using the RAxML BlackBox server  
179 (<http://embnet.vital-it.ch/raxml-bb/>) implementing the methods of Stamatakis et al. (2008). Data  
180 were partitioned as recommended by PartitionFinder and run using the Gamma model of rate  
181 heterogeneity.

182 All *Neobenedenia Cytb* and *28S rRNA* sequences on GenBank were downloaded and  
183 aligned to our data. We also included the *Cytb* sequence of the only full mitochondrial genome  
184 of this genus (JQ038228). A neighbor-joining analysis of the aligned data for each locus was



185 conducted in MEGA 6.06 (Tamura et al., 2013), using uncorrected *P* distance, in an attempt to  
186 reconcile the GenBank sequences with our phylogenetic framework.

187

### 188 **3. Results**

189

#### 190 *3.1. DNA sequence characteristics*

191

192         Amplified *Cytb* and *H3* sequences did not contain any premature stop codons or  
193 frameshift mutations, contributing 704 and 292 characters respectively to the overall  
194 concatenated alignment. Even though we were able to amplify over 800bp of sequence for *28S*  
195 *rDNA*, the sequence spans a highly variable region which we were unable to unambiguously  
196 align, even when using the secondary structure of the *28S rDNA* sequence for *G. salaris* as a  
197 guide. Thus, we were forced to trim our *28S rDNA* sequences to 411 characters. Some *28S rDNA*  
198 and *H3* sequence chromatograms contained overlapping peaks indicative of heterozygous alleles  
199 and these sites were scored with IUPAC ambiguity codes for dimorphic sites. All individuals  
200 included in the analyses are represented by sequences of at least two of the genes (*Cytb* and *H3*  
201 or *28S rDNA*).

202

#### 203 *3.2. Phylogenetic analyses*

204

205         Analysis of the concatenated dataset in PartitionFinder v1.1.1 suggested that three  
206 partitions (*Cytb* codon position 3; *Cytb* codon positions 1 and 2; *H3* codon positions 1, 2 and 3  
207 and *28S rDNA*) were optimal for the data. PartitionFinder selected the General Time Reversible

208 (GTR) model with a gamma distribution for rates across sites (GTR + G), GTR + G  
209 incorporating a proportion of invariable sites (GTR + I + G) and the Symmetrical model with a  
210 gamma distribution for rates across sites (SYM + G) for the partitions respectively.

211 Bayesian (Fig. 1) and Maximum Likelihood (ML) (Fig. 2) analyses yielded essentially  
212 identical topologies, with *Neobenedenia* samples forming a monophyletic clade to the exclusion  
213 of the outgroups and separated into four major clades (A-D). The *Neobenedenia* isolate  
214 recovered from *Lutjanus argentiventris*, Peters 1869, was the exception and was recovered as  
215 part of clade A in the Bayesian analysis (Fig. 1) but as a sister to clade A in the ML analysis  
216 (Fig. 2; labelled A\* for clarity) albeit with low bootstrap support (BS 24%).

217 Samples that comprise clades C and D have been morphologically identified by us (IDW)  
218 as *N. longiprostata*, Bravo-Hollis 1971 and *N. pacifica*, Bravo-Hollis 1971, respectively, while  
219 samples from both A and B are morphologically '*N. melleni*'. Clade B contains a single  
220 specimen collected from *Sphoeroides annulatus*, while clade A contains 28 of the 33 in-group  
221 samples (excluding the sample from *L. argentiventris*) included in the study. The isolate  
222 currently in culture at the Marine Parasitology Laboratory at James Cook University, Townsville,  
223 Australia collected from *Lates calcarifer* (Bowen, Queensland) also fell into clade A

224 The neighbor-joining tree constructed from all available *Cytb* sequences is presented in  
225 Figure 3. Given the proportions of informative sites (Table 3 – Supplementary Material), it is not  
226 surprising that the topology is reflective of the Bayesian and ML analyses. Furthermore, the  
227 sample collected from *L. argentiventris* is recovered as the sister of the clade A in congruence  
228 with the ML analysis (Fig. 2; clade A\*). All of the *Cytb* sequences downloaded from Genbank  
229 fall into clade A, except for accession HMM222533 collected from *S. annulatus* (Perkins et al.  
230 2009), which falls into clade B.

231 Similarly, the neighbor-joining analysis (not shown) from all available *28S rRNA*  
232 sequences also recovered all previously identified clades. The specimen collected from *L.*  
233 *argentiventris* was once again recovered as a separate lineage but clusters with another specimen  
234 collected from *Sebastes rubrivinctus*, Jordan and Gilbert 1880, that was part of clade A in all  
235 other analyses. Several sequences fell into clade B but all these were sampled from *S. annulatus*.

236

#### 237 **4. Discussion**

238 The correct identification of species underpins all biological study and for pathogens is  
239 critical in understanding infection dynamics, predicting outbreaks and determining effective  
240 control strategies. However, in the genus *Neobenedenia*, morphological plasticity, attributed to  
241 host induced morphological variation (Whittington and Horton, 1996), failure to accession  
242 specimens (including wet and mounted material) to curated collections (e.g. Cowell et al., 1993;  
243 Ellis and Watanabe, 1993; Koesharyani et al., 1999; Jahn and Kuhn, 1932; Müller et al., 1992;  
244 Nigrelli and Breder, 1934; Nigrelli, 1935; Nigrelli, 1937; Nigrelli, 1947; Robinson et al., 1992;  
245 Zhang et al. 2014) and the lack of a robust genetic framework to aid in identification, has  
246 hampered these efforts. This study presents the most comprehensive phylogenetic investigation  
247 of *Neobenedenia* spp. to date, incorporating 33 isolates spanning 22 host fish species and nine  
248 countries and used both mitochondrial and nuclear gene markers.

249 Our results clearly show that there is a single species of *Neobenedenia* (Fig 1-3; clade A)  
250 that is both widespread geographically, able to infest a large number of different host fishes, and  
251 can be found on wild, farmed, and captive fish. Most importantly, clade A does not contain  
252 *Neobenedenia* specimens from *Sphoeroides annulatus*, which is likely to be the type host of *N.*  
253 *melleni* according to the description by McCallum (1927) and analysis by Whittington and

254 Horton (1996). Our sample from *S. annulatus* (Fig 1-3; clade B), which was collected from wild  
255 fish in southern Mexico, is well differentiated from clade A and is the sister species to *N.*  
256 *longiprostata* in our analyses. Furthermore, except for HM222533, which was sampled from *S.*  
257 *annulatus* (Perkins et al., 2009) and clusters with our sample in clade B, all other *CytB* sequences  
258 obtained from Genbank which are named both *N. melleni* and *N. girellae* all fall in clade A,  
259 including the *CytB* sequence from the full mitochondrial genome (JQ038228), which is  
260 supposedly *N. melleni* (Zhang et al., 2014). Similarly, all Genbank 28S *rRNA* sequences fall into  
261 clade A unless they were sampled from *S. annulatus*, where they clustered with clade B. Thus,  
262 the results of the present study support the findings by Whittington et al. (2004) and Perkins et  
263 al. (2009) that *N. melleni* and *N. girellae* are cryptic species in that they are morphologically very  
264 similar but genetically distinct. In an effort to stabilise the naming of *Neobenedenia* species, it  
265 seems prudent to ascribe *N. melleni* to individuals in clade B and retain *N. girellae* for those  
266 individuals in clade A.

267 It is likely that clade A\* (Fig. 2, Fig. 3) represents another species of *Neobenedenia*,  
268 however at this stage, it is unclear whether this sample is a previously recorded *Neobenedenia*  
269 species or if it is novel to science. The single specimen represented in this clade is the only one  
270 collected from a lutjanid host (*Lutjanus argentiventris* collected from La Paz, Mexico) and the  
271 assessment of this family of hosts for potential *Neobenedenia* species is an important avenue of  
272 research to pursue. The Bayesian placement of this specimen into clade A appears incorrect  
273 given the long branch length and ML and neighbor-joining analyses clearly differentiate it from  
274 other samples in this study. Further work is underway to assess that status of this individual.

275 The findings of this study suggest that, historically, both prior and post the proposed  
276 synonymy by Whittington and Horton (1996), many of the parasites identified as *N. melleni* may

277 in fact be *N. girellae* given how few isolates were identified as *N. melleni* in this study (e.g.  
278 Bullard et al., 2000; Deveney et al., 2001; Kerber et al., 2011; Landos, 2012; Wang et al., 2004;  
279 Zhang et al., 2014). Accurate identification of *Neobenedenia* species may be hampered by  
280 intraspecific morphological plasticity thereby resulting in false identifications. Despite the  
281 recognised difficulty in differentiating *N. melleni* and *N. girellae*, the majority of studies  
282 focussing on *Neobenedenia* spp. have not stated that they have accessioned samples to museum  
283 or private collections. This makes clarification of previous identifications almost impossible and  
284 accurate identification of historical host species and geographic locations for each of these two  
285 taxa unachievable. However, given the number of isolates that were included in this study and  
286 the varied host species and locations they were collected from, it is likely that the number of  
287 hosts and locations that *N. melleni* has been credited infecting and inhabiting has been  
288 overestimated. To facilitate morphological and genetic comparison of individuals in the future, it  
289 is recommended to accession reference material (both mounted and fixed specimens).

290         Using our genetic framework, it will be possible to reassess the morphological  
291 differences between *N. girellae* and *N. melleni a posteriori*. The *CytB* neighbor-joining analysis  
292 shows significant substructuring in *N. girellae*, which may account for the variable morphology  
293 noted by Whittington and Horton (1996). Morphological variation can be due to epigenetic  
294 factors which influences the phenotype expressed depending on the particular environment being  
295 experienced (Agrawal 2001; Mati et al., 2014; Olstad et al., 2009; Via et al., 1995). The  
296 flexibility displayed by these parasites makes the identification of species solely through  
297 morphological means considerably challenging (Barcak et al., 2014; Bickford et al., 2006). As  
298 closely related cryptic parasite species may exhibit variable traits to one another such as host  
299 susceptibility (Reversat et al., 1989), pathogenicity (Haque et al., 2003; Homan and Mank, 2001;

300 Skovgaard, et al., 2002), and epidemiology (Murrell and Pozio, 2000), accurate identification is  
301 crucial to understand the risk posed by the presence of a particular species in a system.

302 *Neobenedeniagirellae* infects a large number of fish species of economic importance  
303 including commercial fisheries, aquaculture, and the ornamental trade (Ogawa et al., 1995;  
304 2006). *Neobenedeniagirellae* isolates were collected from several fish species that support major  
305 aquaculture production or commercial fisheries including *Latescalcarifer* (barramundi or Asian  
306 sea bass), *Epinepheluscoioides* (gold-spot grouper), *Coryphaenahippurus* (mahi mahi or  
307 dolphinfish), *Plectropomusleopardus* (coral trout), *Rachycentroncanadum* (cobia), *Seriola*  
308 *lalandi* (yellowtail kingfish), and *Seriolarivoliana* (almaco jack), Valenciennes 1873 (Fig. 1).  
309 Similarly, attractive tropical species are also at risk. Parasites infecting eight species of popular  
310 ornamental fish species from seven families were among the isolates included in this study. All  
311 represent new host records for *N.girellae* and show the diversity of host species this parasite can  
312 infect (Table 1; see 3.1.). Ornamental fish support a huge, multi-national industry that involves  
313 hundreds of fish species (and their associated pathogen communities) being transported all  
314 around the globe (Bruckner, 2004). This provides an excellent opportunity for the dispersal of *N.*  
315 *girellae*, further encouraged by its lack of host specificity. Surveillance of this pathway for *N.*  
316 *girellae* is advised given its broad host specificity.

317 Isolates collected from two outbreaks on *L.calcarifer* which occurred in Queensland  
318 Australia, the first on a fish farm in Hinchinbrook in 2000 and the second in Gladstone in 2014  
319 were included in this study (Table 1) and were determined to be a part of the *N.girellae* clade  
320 (Figure 1-2). The parasites of concern were initially identified as *N.melleni* by Deveney et al.  
321 (2001) and Landos (2012), however, our study suggests that these were erroneous identifications  
322 and the species associated with these mortality events was in fact *N.girellae*. Similarly, the

323 previously unidentified species of *Neobenedenia* which is currently being cultured at the Marine  
324 Parasitology Laboratory at James Cook University, Townsville has also been identified as *N.*  
325 *girellae* using this analysis. As such, all previous research on this species from the Marine  
326 Parasitology Laboratory is now ascribed to *Neobenedenia girellae* (i.e. Brazenor and Hutson  
327 2015; Dinh Hoai and Hutson 2014; Hutson et al. 2012; Militz et al. 2013a; 2013b; Militz and  
328 Hutson 2015; Trujillo-Gonzalez et al. 2015a,b).

329         The large diversity of host species that *N. girellae* is able to infect (23 host species  
330 determined from the present study) and the geographic range in which it is present (found  
331 between latitudes 23.8489° S and 24.1422° N (wild isolates) and 23.8426° S and 24.1426° N (all  
332 isolates) from samples included in this study) makes it a globally cosmopolitan species and a  
333 threat to aquaculture industries around the world.

334

### 335 **Acknowledgments**

336         AKB was supported by an Australian Postgraduate Award and funding from the JCU  
337 Graduate Research School Research Grants program. Partial funding for this work was provided  
338 through a Queensland Government Smart Futures grant to TLM and KSH. This research was  
339 supported by use of the Nectar Research Cloud, a collaborative Australian research platform  
340 supported by the National Collaborative Research Infrastructure Strategy (NCRIS). Dr Leslie  
341 Chisholm, South Australian Museum and Dr Robert Adlard Queensland Museum accessioned  
342 specimens. We thank all colleagues who contributed specimens for this research: Roger Chong,  
343 Ariel Diamant, Mark Hilder, Noritaka Hirazawa, Thane Militz, Federico Rotman, David  
344 Vaughan, Erik Vis, and Roger Williams.

345           The authors would like to acknowledge Ian Whittington who passed away in October  
346 2014. He was a greatly appreciated colleague and friend and without his enthusiasm of Capsalid  
347 research this study would not have been possible. He is deeply missed.

348

## 349 **References**

350

351 Agrawal, A.A., 2001. Phenotypic Plasticity in the Interactions and Evolution of Species. *Science*  
352           294, 321–326.

353 Barcak, D., Oros, M., Hanzelova, V., Scholz, T., 2014. Phenotypic plasticity in *Caryophyllaeus*  
354           *brachycollis* Janiszewska, 1953 (Cestoda: Caryophyllidea): does fish host play a role?  
355           *Syst. Parasitol.* 88, 153–166.

356 Bauer, O.N., Hoffman, G.L., 1976. Helminth range extension by translocation of fish. In: Page,  
357           L.A. (Ed.), *Wildlife Diseases*, Plenum, New York, pp. 163–172.

358 Bickford, D., Lohman, D.J., Sodhi, N.S., Ng, P.K.L., Meier, R., Winker, K., Ingram, K.K., Das,  
359           I., 2006. Cryptic species as a window on diversity and conservation. *Trends Ecol. Evol.*  
360           22, 148–155.

361 Blasco-Costa, I., Balbuena, J.A., Raga, J.A., Kostadinova, A., Olson, P.D., 2010. Molecules and  
362           morphology reveal cryptic variation among digeneans infecting sympatric mullets in the  
363           Mediterranean. *Parasitology* 137, 287–302.

364 Bravo-Hollis, M., 1958. Trematodes de peces marinos de aguas mexicanas. XIV. Cuarto  
365           monogéneos de la familia Capsalidae Baird, 1853, de las costas del Pacífico, incluyendo  
366           una especie nueva. *An. Inst. Biol.* 28, 195–216.



- 367 Bravo-Hollis, M., Deloya, J.C., 1973. Catálogo de la colección helmintológica del Instituto de  
368 Biología. Instituto de Biología Universidad Nacional Autónoma de México 2, 137.
- 369 Brazenor, A.K., Hutson, K.S., 2015. Effects of temperature and salinity on the life cycle of  
370 *Neobenedenia* sp. (Monogenea: Capsalidae) infecting farmed barramundi (*Lates*  
371 *calcarifer*). Parasitol. Res.114, 1875–1886.
- 372 Bullard, S.A., Benz, G.W., Overstreet, R.M., Williams, E.H., Hemdal, J., 2000. Six new host  
373 records and an updated list of wild hosts for *Neobenedenia melleni* (MacCallum)  
374 (Monogenea: Capsalidae). Comp. Parasitol. 67, 190–196.
- 375 Byrnes, T., Rohde, K., 1992. Geographical distribution and host specificity of ectoparasites of  
376 Australian bream, *Acanthopagrus* spp. (Sparidae). Folia Parasitol. 39, 249–264.
- 377 Chisholm, L.A., Morgan, J.A.T., Adlard, R.D., Whittington, I.D., 2001. Phylogenetic analysis of  
378 the Monocotylidae (Monogenea) inferred from the 28s rDNA sequences. Int. J. Parasitol.  
379 31, 1253-1263.
- 380 Colgan, D.J., McLauchlan, A., Wilson, G.D.F., Livingston, S.P., Edgecombe, G.D., Macaranas,  
381 J., Cassis, G., Gray, M.R., 1998. Histone H3 and U2 snRNA DNA sequences and  
382 arthropod molecular evolution. Aust. J. Zool. 46, 419-437.
- 383 Cowell, L.E., Watanabe, W.O., Head, W.D., Grover, J.J., Shenker, J.M., 1993. Use of tropical  
384 cleaner fish to control the ectoparasite *Neobenedenia melleni* (Monogenea: Capsalidae)  
385 on seawater-cultured Florida red tilapia. Aquaculture 113, 189–200.
- 386 Deveney, M., Chisholm, L., Whittington, I., 2001. First published record of the pathogenic  
387 monogenean parasite *Neobenedenia melleni* (Capsalidae) from Australia. Dis. Aquat.  
388 Organ. 46, 79–82.

- 389 Dinh Hoai, T., Hutson, K.S., 2014. Reproductive strategies of the insidious fish ectoparasite,  
390 *Neobenedenia* sp. (Capsalidae: Monogenea). Plos One 9, 1–7.
- 391 Donald, K.M., Kennedy, M., Poulin, R., Spencer, H.G., 2004. Host specificity and molecular  
392 phylogeny of larval Digenea isolated from New Zealand and Australian topshells  
393 (Gastropoda: Trochidae). Int. J. Parasitol. 34, 557–568.
- 394 Ellis, E.P., Watanabe, W.O., 1993. The effects of hyposalinity on eggs, juveniles and adults of  
395 the marine monogenean, *Neobenedenia melleni* Treatment of ecto-parasitosis in  
396 seawater-cultured tilapia. Aquaculture 117, 15–27.
- 397 Freeman M. A., Ogawa K. 2010. Variation in the small subunit ribosomal DNA confirms that  
398 *Udonella* (Monogenea: Udonellidae) is a species-rich group. Int. J. Parasitol. 40(2), 255–  
399 264.
- 400 Gaida, I.H., Frost, P., 1991. Intensity of *Neobenedeniagirellae* (Monogenea: Capsalidae) on the  
401 halfmoon, *Medialuna californiensis* (Perciformes: Kyphosidae), examined using a new  
402 method for detection. Proceedings of the Helminthological Society of Washington 59,  
403 129–130.
- 404 Gibson, D., Harris, P., Bray, R. (2010). Capsalidae Baird, 1853. Accessed through: World  
405 Register of Marine Species at  
406 <http://www.marinespecies.org/aphia.php/aphia.php?p=taxdetails&id=119225> on 2016-  
407 11-19.
- 408 Hargis, W. J., 1955. A New Species of *Benedenia* (Trematoda: Monogenea) from *Girella*  
409 *nigricans*, the Opaleye. J. Parasitol. 41(1), 48–50.

- 410 Harris P. D., Shinn A. P., Cable J., Bakke T. A., 2004. Nominal species of the genus  
411 *Gyrodactylus* von Nordmann 1832 (Monogenea: Gyrodactylidae), with a list of principal  
412 host species. *Syst. Parasitol.* 59, 1–27.
- 413 Hutson, K., Mata, L., Paul, N., de Nys, R., 2012. Seaweed extracts as a natural control against  
414 the monogenean ectoparasite, *Neobenedenia* sp., infecting farmed barramundi (*Lates  
415 calcarifer*). *Int. J. Parasitol.* 42, 1135–1141.
- 416 Jahn, T.L., Kuhn, L.R., 1932. The life history of *Epibdella melleni*, MacCallum, 1927, a  
417 monogenetic trematode parasitic in marine fishes. *Biol. Bull.* 62, 89–111.
- 418 Koesharyani, I., Zafran., Yuasa, K., Hatai, K., 1999. Two Species of Capsalid Monogeneans  
419 Infecting Cultured Humpback Grouper *Cromileptes altivelis* in Indonesia. *Fish Pathol.*  
420 34, 165–166.
- 421 Landos, M., 2012. Investigation of the Causes of Aquatic Animal Health Problems in the  
422 Gladstone Harbour and Nearshore Waters. Report commissioned by the Gladstone  
423 Fishing Research Fund, pp. 191.
- 424 Lanfear, R., Calcott, B., Ho, S., Guindon S., 2012. PartitionFinder: combined selection of  
425 partitioning schemes and substitution models for phylogenetic analyses. *Mol. Biol. Evol.*  
426 29 (6), 1695–1701.
- 427 Leung, T.L.F., Keeney, D.B., Poulin, R., 2009. Cryptic species complexes in manipulative  
428 echinostomatid trematodes: when two become six. *Parasitology* 136, 241–252.
- 429 Littlewood, D.T.J., Rohde, K., Clough, K.A., 1997. Parasite speciation within or between host  
430 species? Phylogenetic evidence from site-specific polystome monogeneans. *Int. J.  
431 Parasitol.* 27, 1289–1297.

- 432 Love, M.S., Shriner, K., Morris, P., 1984. Parasites of olive rockfish, *Sebastes serranoides*  
433 (Scorpaenidae) off central California. Fish. Bull. 82, 530–537.
- 434 Matejusová, I., Cunningham, C.O., 2004. The First Complete Monogenean Ribosomal RNA  
435 Gene Operon: Sequence and Secondary Structure of the *Gyrodactylus salaris* Malmberg,  
436 1957, Large Subunit Ribosomal RNA Gene. J. Parasitol. 90(1), 146–151.
- 437 Mati, V.L.T., Freitas, R.M., Bicalho, R.S., Melo, A.L., 2014. Phenotypic plasticity of male  
438 *Schistosoma mansoni* from the peritoneal cavity and hepatic portal system of laboratory  
439 mice and hamsters. J. Helminthol. 29, 294–301.
- 440 Militz, T.A., Southgate, P.C., Carton, A.G., Hutson, K.S., 2013. Efficacy of garlic (*Allium*  
441 *sativum*) extract applied as a therapeutic immersion treatment for *Neobenedenia* sp.  
442 management in aquaculture. J. Fish Dis. 1–11.
- 443 Militz, T.A., Southgate, P.C., Carton, A.G., Hutson, K.S., 2013. Dietary supplementation of  
444 garlic (*Allium sativum*) to prevent monogenean infection in aquaculture. Aquaculture  
445 408-409, 95-99.
- 446 Militz, T.A., Hutson, K.S., 2015. Beyond Symbiosis: Cleaner Shrimp Clean Up in Culture. Plos  
447 One 10(2): e0117723.
- 448 Miura, O., Kuris, A.M., Torchin, M.E., Hechinger, R.F., Dunham, E.J., Chiba, S., 2005.  
449 Molecular-genetic analyses reveal cryptic species of trematodes in the intertidal  
450 gastropod, *Batillaria cumingi* (Crosse). Int. J. Parasitol. 35, 793–801.
- 451 Moser, M., Haldorson, L., 1982. Parasites of two species of surfperch (Embiotocidae) from  
452 seven Pacific coast locales. J. Parasitol. 68, 733–735.

- 453 Müeller, K.W., Watanabe, W.O., Head, W.D., 1992. Effect of Salinity on Hatching in  
454 *Neobenedenia melleni*, a Monogenean Ectoparasite of Seawater-Cultured Tilapia. Journal  
455 of the World Aquac. Soc. 23, 199–204.
- 456 Murrell, K.D., Pozio, E., 2000. Trichinellosis: the zoonosis that won't go quietly. Int. J. Parasitol.  
457 30, 1339–1349.
- 458 Nigrelli, R.F., Breder, C.M., 1934. The susceptibility and immunity of certain marine fishes to  
459 *Epibdella melleni*, a monogenetic trematode. J. Parasitol. 20, 259–269.
- 460 Nigrelli, R.F., 1935. Studies on the acquired immunity of the pompano, *Trachinotus carolinus*, to  
461 *Epibdella melleni*. J. Parasitol. 21, 438–439.
- 462 Nigrelli, R.F., 1937. Further studies on the susceptibility and acquired immunity of marine fishes  
463 to *Epibdella melleni*, a monogenetic trematode. Zoologica 22, 185–192.
- 464 Nigrelli, R.F., 1947. Susceptibility and immunity of marine fishes to *Benedenia* (= *Epibdella*)  
465 *melleni* (MacCallum), a monogenetic trematode. III. Natural hosts in the West Indies. J.  
466 Parasitol. 33, 25.
- 467 Ogawa, K., Bondad-Reantaso, M.G., Fukudome, M., Wakabayashi, H., 1995. *Neobenedenia*  
468 *girellae* (Hargis, 1955) Yamaguti, 1963 (Monogenea: Capsalidae) from Cultured Marine  
469 Fishes of Japan. J. Parasitol. 81, 223–227.
- 470 Ogawa, K., 1996. Marine parasitology with special reference to Japanese fisheries and  
471 mariculture. Vet. Parasitol. 64, 95–105.
- 472 Ogawa, K., Yokoyama, H., 1998. Parasitic diseases of cultured marine fish in Japan. Fish Pathol.  
473 33, 303-309.
- 474 Ogawa, K., 2006. Impacts of diclidophorid monogenean infections on fisheries in Japan. Int. J.  
475 Parasitol. 32, 373–380.

- 476 Olstad, K., Bachmann, L., Bakke, T. A., 2009. Phenotypic plasticity of taxonomic and diagnostic  
477 structures in gyrodactylosis-causing flatworms (Monogenea, Platyhelminthes).  
478 *Parasitology* 136, 1305–1315.
- 479 Paperna, I., Overstreet, R., 1981. Parasites and diseases of mullets (Mugilidae). In: Oren, O.H.E.  
480 (Ed.), *Aquaculture of Grey Mulletts*, Cambridge University Press, Cambridge, pp. 411–  
481 493.
- 482 Perkins, E.M., Donnellan, S.C., Bertozzi, T., Chisholm, L.A., Whittington, I.D., 2009. Looks can  
483 deceive: Molecular phylogeny of a family of flatworm ectoparasites (Monogenea:  
484 Capsalidae) does not reflect current morphological classification. *Mol. Phylogenet. Evol.*  
485 52, 705–714.
- 486 Robinson, R.D., Khalil, L.F., Hall, R.N., Steele, R.D., 1992. Infection of red hybrid tilapia with a  
487 monogenean in coastal waters off southern Jamaica. *Proc. Gulf Caribb. Fish. Inst.* 42,  
488 441–447.
- 489 Rohde, K., 1979. A critical evaluation of intrinsic and extrinsic factors responsible for niche  
490 restriction in parasites. *Am. Nat.* 114, 648–671.
- 491 Ronquist, F., Teslenko, M., van der Mark, P., Ayres, D., Darling, A., Höhna, S., Larget, B., Liu,  
492 L., Suchard, M.A. and Huelsenbeck, J.P., 2012. MrBayes 3.2: Efficient Bayesian  
493 phylogenetic inference and model choice across a large model space. *Syst. Biol.* 61, 539–  
494 542.
- 495 Saijuntha, W., Sithithaworn, P., Wongkham, S., Laha, T., Pipitgool, V., Tesana, S., Chilton,  
496 N.B., Petney, T.N., Andrews, R.H., 2007. Evidence of a species complex within the food-  
497 borne trematode *Opisthorchis viverrini* and possible co-evolution with their first  
498 intermediate hosts. *Int. J. Parasitol.* 37, 695–703.

- 499 Skovgaard, K., Bødker, L., Rosendahl, S., 2002. Population structure and pathogenicity of  
500 members of the *Fusarium oxysporum* complex isolated from soil and root necrosis of pea  
501 (*Pisum sativum* L). FEMS Microbiol. Ecol. 42, 367–374.
- 502 Stamatakis, A., Hoover, P., Rougemont, J. 2008. A Rapid Bootstrap Algorithm for the RAxML  
503 Web-Servers, Syst. Biol. 75(5): 758–771.
- 504 Sepúlveda, F.A., González, M.T., 2014. Molecular and morphological analyses reveal that the  
505 pathogen *Benedenia seriolae* (Monogenea: Capsalidae) is a complex species:  
506 Implications for yellowtail *Seriola* spp. aquaculture. Aquaculture 418-419, 94–100.
- 507 Tamura, K., Stecher, G., Peterson, D., Filipski, A. and Kumar S., 2013. MEGA6: Molecular  
508 Evolutionary Genetics Analysis version 6.0. Mol. Biol. Evol. 30, 2725–2729.
- 509 Trujillo-González, A., Johnson, L.K., Constantinoiu, C.C., Hutson, K.S., 2015a. Histopathology  
510 associated with haptor attachment of the ectoparasitic monogenean *Neobenedenia* sp.  
511 (Capsalidae) to barramundi, *Lates calcarifer* (Bloch). J. Fish Dis. 38(12), 1063–1067.
- 512 Trujillo-González, A., Constantinoiu, C.C., Rowe, R., Hutson, K.S., 2015b. Tracing transparent  
513 monogenean parasites on fish from infection to maturity. Int. J. Parasitol. 4, 316–322.
- 514 Via, S., Gomulkiewica, R., Jong, G., Scheiner, S.M., Schlichting, C.D., Van Tienderen, P.H.,  
515 1995. Adaptive phenotypic plasticity: consensus and controversy. Trends Ecol. Evolut.  
516 10, 212–217.
- 517 Wang, J., Zhang, W., Su, Y., Ding, S., 2004. Genetic relationship between *Neobenedenia*  
518 *girellae* and *N. melleni* inferred from 28S rDNA sequences. Acta Oceanol. Sin. 23, 709–  
519 716.
- 520 Whittington, I., 1998. Diversity "down under": monogeneans in the Antipodes (Australia) with a  
521 prediction of monogenean biodiversity worldwide. Int. J. Parasitol. 28, 1481–1493.

- 522 Whittington, I.D., 1996. Benedeniine capsalid monogeneans from Australian fishes: pathogenic  
523 species, site-specificity and camouflage. *J. Helminthol.* 70, 177–184.
- 524 Whittington, I.D., Cribb, B.W., Hamwood, T.E., Halliday, J.A., 2000. Host-specificity of  
525 monogenean (platyhelminth) parasites: a role for anterior adhesive areas? *Int. J. Parasitol.*  
526 30, 305–320.
- 527 Whittington, I.D., 2004. The Capsalidae (Monogenea: Monopisthocotylea): a review of diversity,  
528 classification and phylogeny with a note about species complexes. *Folia Parasitol.* 51,  
529 109–122.
- 530 Whittington, I.D., Deveney, M.R., Morgan, J.A.T., Chisholm, L.A., Adlard, R.D., 2004. A  
531 preliminary phylogenetic analysis of the Capsalidae (Platyhelminthes: Monogenea:  
532 Monopisthocotylea) inferred from large subunit rDNA sequences. *Parasitology* 128, 511–  
533 519.
- 534 Wu, X.Y., Chilton, N.B., Zhu, X.Q., Xie, M.Q., Li, A.X., 2005. Molecular and morphological  
535 evidence indicates that *Pseudorhabdosynochus lantauensis* (Monogenea: Diplectanidae)  
536 represents two species. *Parasitology* 130, 669–677.
- 537 Xiao, N., Qui, J., Nakao, M., Li, T., Yang, W., Chen, X., Schantz, P.M., Craig, P.S., Ito, A.,  
538 2005. *Echinococcus shiquicus* n. sp., a taeniid cestode from Tibetan fox and plateau pika  
539 in China. *Int. J. Parasitol.* 35, 693–701.
- 540 Yoshinaga, T., Segawa, I., Kamaishi, T., Sorimachi, M., 2000. Effects of temperature, salinity  
541 and chlorine treatment on egg hatching of the monogenean *Neoheterobothrium hirame*  
542 infecting Japanese flounder. *Fish Pathol.* 35, 85–88.
- 543 Zhang, J., Wu, X., Li, Y., Zhao, M., Xie, M., Li, A., 2014. The complete mitochondrial genome  
544 of *Neobenedenia melleni* (Platyhelminthes: Monogenea): mitochondrial gene content,



545 arrangement and composition compared with two *Benedenia* species. Mol. Biol. Rep. 41,  
546 6583–6589.

Table 1: Host fish species from which *Neobenedenia* were sampled and used for sequencing from Australia and overseas.

| Host species                          | Figure codes | Origin             | Location                                   | Genbank accession codes * |      |      |
|---------------------------------------|--------------|--------------------|--------------------------------------------|---------------------------|------|------|
|                                       |              |                    |                                            | H3                        | 28s  | Cytb |
| <i>Lates calcarifer</i>               | Latcal1      | Wild               | Gladstone, QLD, Australia                  | XXXX                      | XXXX | XXXX |
| <i>Lates calcarifer</i>               | Latcal2      | Captive-Farm       | Bowen, QLD, Australia                      | XXXX                      | XXXX | XXXX |
| <i>Lates calcarifer</i> (2011)        | Latcal3      | Captive-Farm       | Hinchinbrook, QLD, Australia               | XXXX                      | XXXX | XXXX |
| <i>Lates calcarifer</i>               | Latcal4      | Captive-Research   | MARF, Townsville, QLD, Australia           | XXXX                      | XXXX | XXXX |
| <i>Lates calcarifer</i>               | Latcal5      | Captive-Farm       | Singapore                                  | XXXX                      | XXXX | XXXX |
| <i>Lates calcarifer</i> (2000)        | Latcal6      | Captive-Farm       | Hinchinbrook, QLD, Australia               | XXXX                      | XXXX | XXXX |
| <i>Seriola lalandi</i>                | Serlal       | Captive-Farm       | WA, Australia                              | XXXX                      | XXXX | XXXX |
| <i>Trachinotus kennedeyi</i>          | Traken       | Wild               | La Paz, Mexico                             | XXXX                      | XXXX | XXXX |
| <i>Oligoplites altus</i>              | Olialt       | Wild               | La Paz, Mexico                             | XXXX                      | XXXX | XXXX |
| <i>Gnathanodon speciosus</i>          | Gnaspec1     | Wild               | La Paz, Mexico                             | XXXX                      | XXXX | XXXX |
| <i>Gnathanodon speciosus</i>          | Gnaspec2     | Captive-Aquarium   | Durban, South Africa                       | XXXX                      | XXXX | XXXX |
| <i>Seriola rivoliana</i>              | Serriv       | Captive-Farm       | Hawaii, USA                                | XXXX                      | XXXX | XXXX |
| <i>Rachycentron canadum</i>           | Raccan1      | Captive-Research   | MARF, Townsville, QLD, Australia           | XXXX                      | XXXX | XXXX |
| <i>Rachycentron canadum</i>           | Raccan2      | Captive            | Panama                                     | XXXX                      | XXXX | XXXX |
| <i>Rachycentron canadum</i>           | Raccan3      | Captive            | Italy                                      | XXXX                      | XXXX | XXXX |
| <i>Mycteroperca rosacea</i>           | Mycros       | Wild               | La Paz, Mexico                             | XXXX                      | XXXX | XXXX |
| <i>Epinephelus coioides</i>           | Epicoi       | Captive-Research   | Cairns, QLD, Australia                     | XXXX                      | XXXX | XXXX |
| <i>Arothron caercaeruleopunctatus</i> | Arocae       | Captive-Ornamental | Townsville, QLD, Australia                 | XXXX                      | XXXX | XXXX |
| <i>Canthigaster bennetti</i>          | Canben       | Captive-Ornamental | Townsville, QLD, Australia                 | XXXX                      | XXXX | XXXX |
| <i>Sphoeroides annulatus</i>          | Sphann       | Wild               | La Paz, Mexico                             | XXXX                      | XXXX | XXXX |
| <i>Coryphaena hippurus</i>            | Corhip1      | Captive            | WA, Australia                              | XXXX                      | XXXX | XXXX |
| <i>Coryphaena hippurus</i>            | Corhip2      | Captive-Aquarium   | Durban                                     | XXXX                      | XXXX | XXXX |
| <i>Mugil curema</i>                   | Mugcur1      | Wild               | La Paz, Mexico                             | XXXX                      | XXXX | XXXX |
| <i>Mugil curema</i>                   | Mugcur       | Wild               | La Paz, Mexico                             | XXXX                      | XXXX | XXXX |
| <i>Nemateleotris decora</i>           | Nemdec       | Captive-Ornamental | Townsville, QLD, Australia                 | XXXX                      | XXXX | XXXX |
| <i>Pseudocheilinus hexataenia</i>     | Psehex1      | Captive-Ornamental | Townsville, Q QLD, Australia (June 2012)   | XXXX                      | XXXX | XXXX |
| <i>Pseudocheilinus hexataenia</i>     | Psehex2      | Captive-Ornamental | Townsville, QLD, Australia (December 2012) | XXXX                      | XXXX | XXXX |
| <i>Pseudochromis fridmani</i>         | Psefri       | Captive-Ornamental | Townsville, QLD, Australia                 | XXXX                      | XXXX | XXXX |
| <i>Verasper variegatus</i>            | Vervar       | Captive-Farm       | Japan                                      | XXXX                      | XXXX | XXXX |
| <i>Sebastes rubrivinctus</i>          | Sebrub       | Captive-Farm       | USA                                        | XXXX                      | XXXX | XXXX |
| <i>Neocirrhites armatus</i>           | Neoarm       | Captive-Ornamental | Townsville, QLD, Australia                 | XXXX                      | XXXX | XXXX |
| <i>Echeneis naucrates</i>             | Echnau       | Captive-Ornamental | Woods Hole, MS, USA                        | XXXX                      | XXXX | XXXX |
| <i>Sparus aurata</i>                  | Spaaur       | -                  | Eilat, Israel                              | XXXX                      | XXXX | XXXX |
| <i>Lutjanus argentiventris</i>        | Lutarg       | Wild               | La Paz, Mexico                             | XXXX                      | XXXX | XXXX |

MARF = Marine Aquaculture Research Facility, James Cook University, Townsville; USA = United States of America, WA = Western Australia; QLD = Queensland, XXXX = Codes forthcoming upon acceptance of manuscript.\* If no code present for a particular gene, it was unable to be sequenced for analysis.

Table 2: Primers used for PCR amplification of *Neobenedenia* spp. isolates.

| Gene            | Primer ID | Sequence (5'-3')         | Forward/Reverse | Source |
|-----------------|-----------|--------------------------|-----------------|--------|
| <i>H3</i>       | G926      | GACCGCYCGYAAAAGYAC       | F               | a      |
|                 | G927      | AGCRTGRATDGCRCACAA       | R               | a      |
|                 | H3aF      | ATGGCTCGTACCAAGCAGACVGC  | F               | b      |
|                 | H3R2      | ATRTCCTTGGGCATGATTGTTAC  | R               | b      |
| <i>28S rDNA</i> | C1        | ACCCGCTGAATTTAAGCAT      | F               | c      |
|                 | D1        | TGGTCCGTGTTTCAAGAC       | R               | c      |
|                 | EC-D2     | CCTTGGTCCGTGTTTCAAGACGGG | R               | d      |
| <i>Cytb</i>     | M1676     | TGAGTTATTATTGATGTAGAGG   | F               | e      |
|                 | M1677     | AAAATATCAKTCAGGCTTWA     | R               | e      |

<sup>a</sup> Perkins et al. (2009); <sup>b</sup> Colgan et al. (1998); <sup>c</sup> Chisholm et al. (2001); <sup>d</sup> Littlewood et al. (1997); <sup>e</sup> present study.

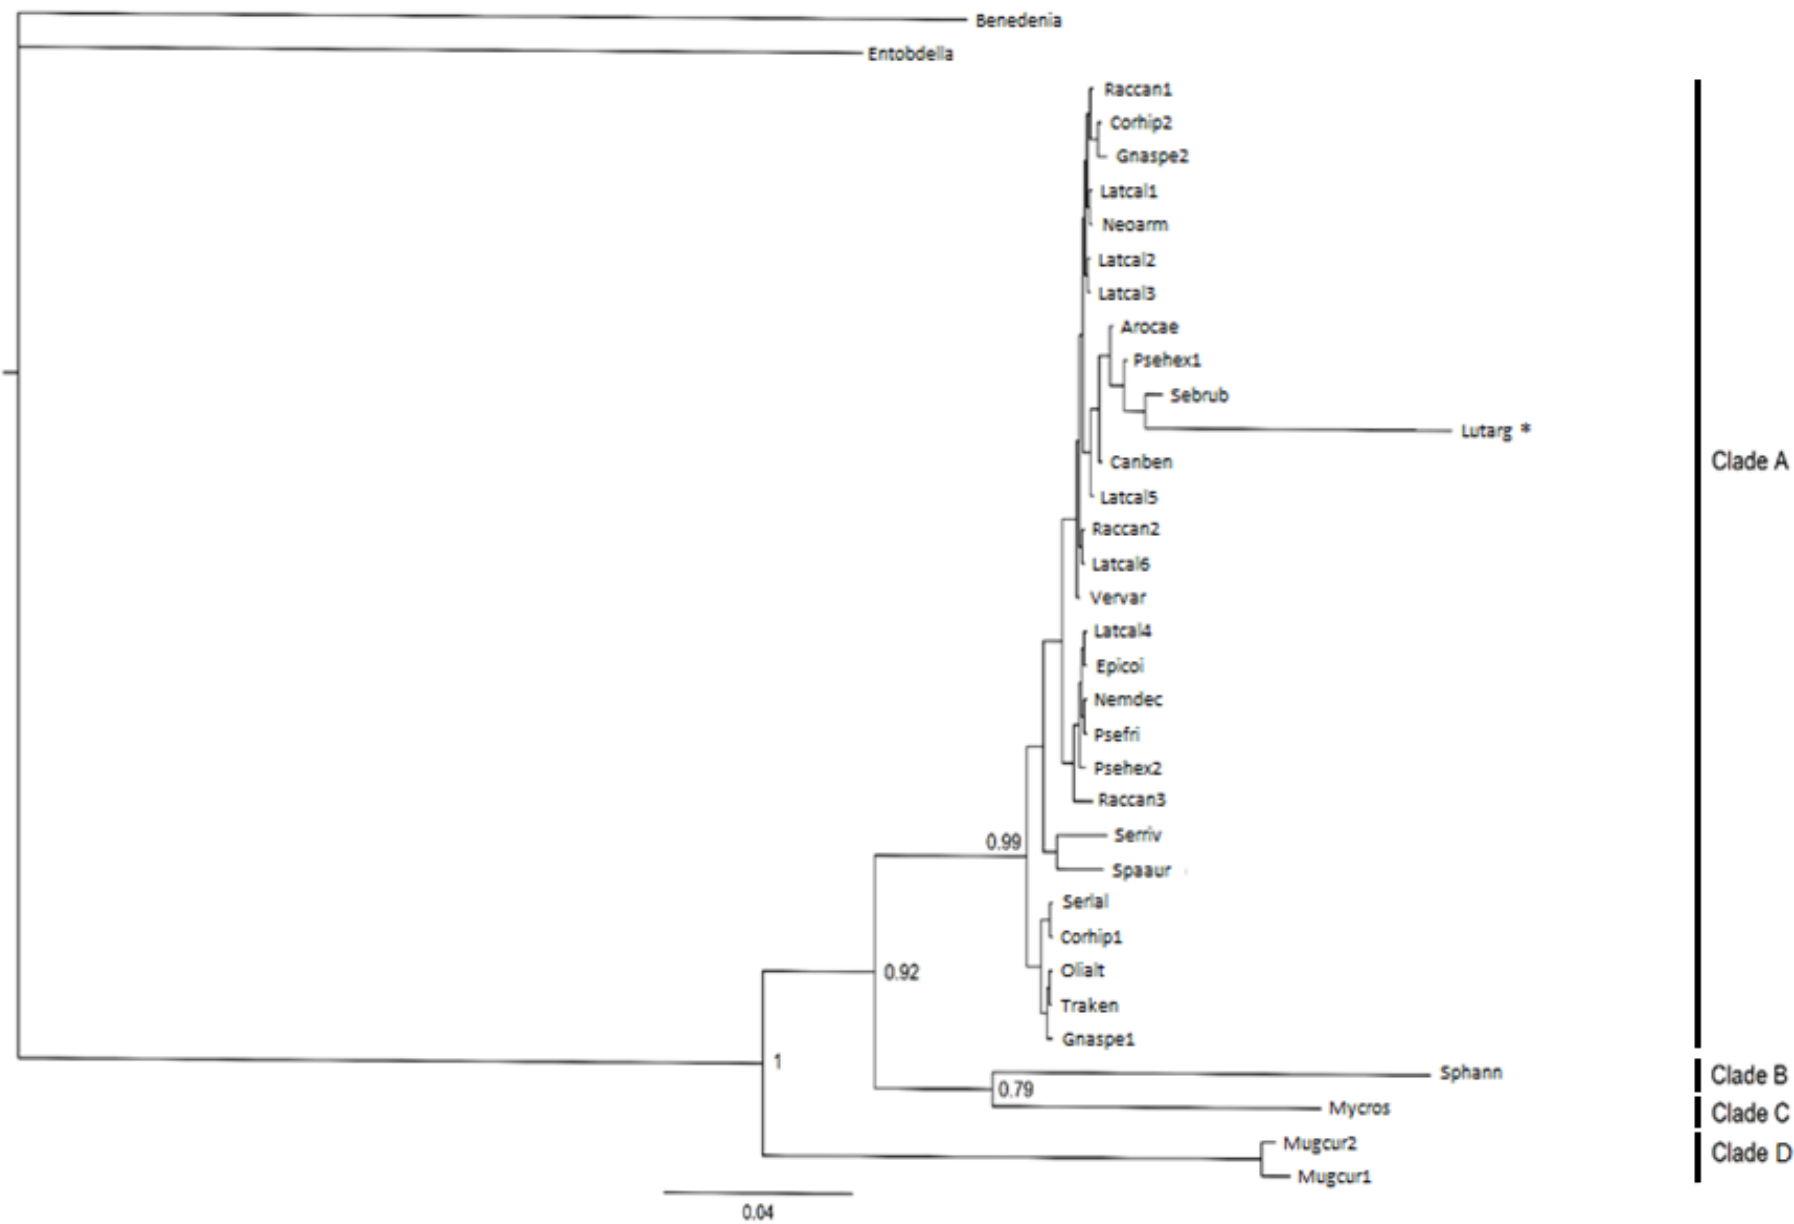

Fig. 1. Relationships of species of *Neobenedenia* isolates collected from wild and captive host fish based on Bayesian inference and maximum likelihood analyses of the *H3*, *28S rDNA*, and *cytochrome b* concatenated dataset. Posterior probability values are next to major nodes. “Benedenia” = *Benedenia seriolae* (HM222526.1 (*Seriola hippos* – South Australia, Australia), AY033941.1 (*Seriola quinqueradiata* – Japan), and FJ972088.1 (*Seriola hippos* – South Australia, Australia)) and “Entobdella” = *Entobdella soleae* (FJ972108.1 (*Solea solea* – United Kingdom), AY486152.1 (*Solea solea* – United Kingdom), HQ684799.1 (unknown host – China)) sequences obtained from Genbank were included as outgroups.

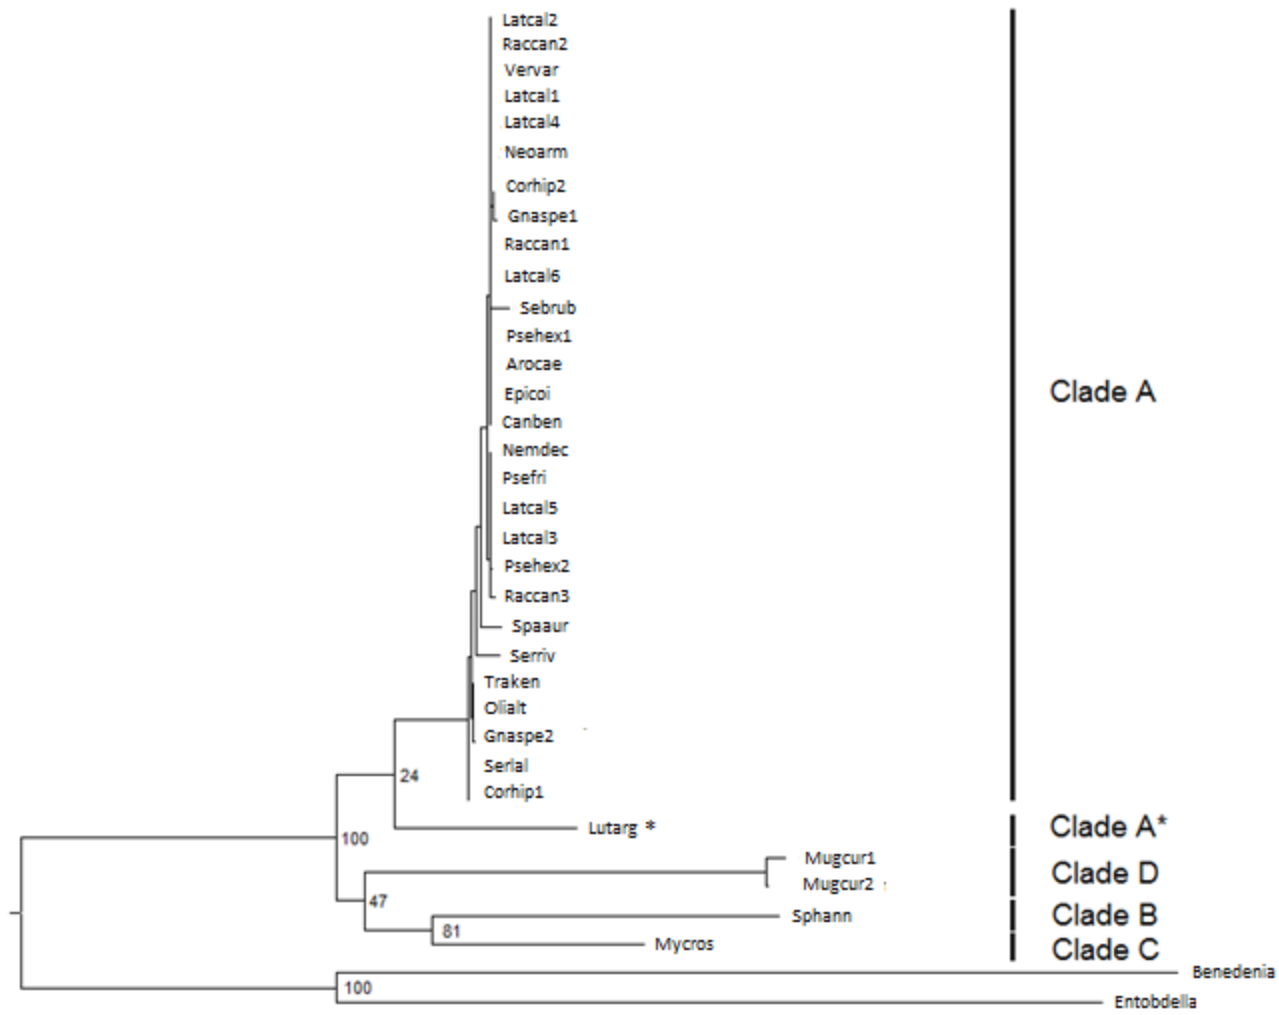

2 Fig. 2. Relationships of species of *Neobenedenia* isolates collected from wild and captive host fish based on Maximum likelihood  
3 analysis of the *H3*, *28S rDNA*, and *cytochrome b* concatenated dataset. Maximum likelihood bootstrap proportions are next to major  
4 nodes. “Benedenia” = *Benedenia seriolae* (HM222526.1 (*Seriola hippos* – South Australia, Australia), AY033941.1 (*Seriola*  
5 *quinqeradiata* – Japan), and FJ972088.1 (*Seriola hippos* – South Australia, Australia)) and “Entobdella” = *Entobdella soleae*  
6 (FJ972108.1 (*Solea solea* – United Kingdom), AY486152.1 (*Solea solea* – United Kingdom), HQ684799.1 (unknown host – China))  
7 sequences obtained from Genbank were included as outgroups. Clades labelled as per the topology of Figure 1. \* indicates the  
8 *Lutjanus argentiventris* sample from Clade A in Figure 1.

9

10

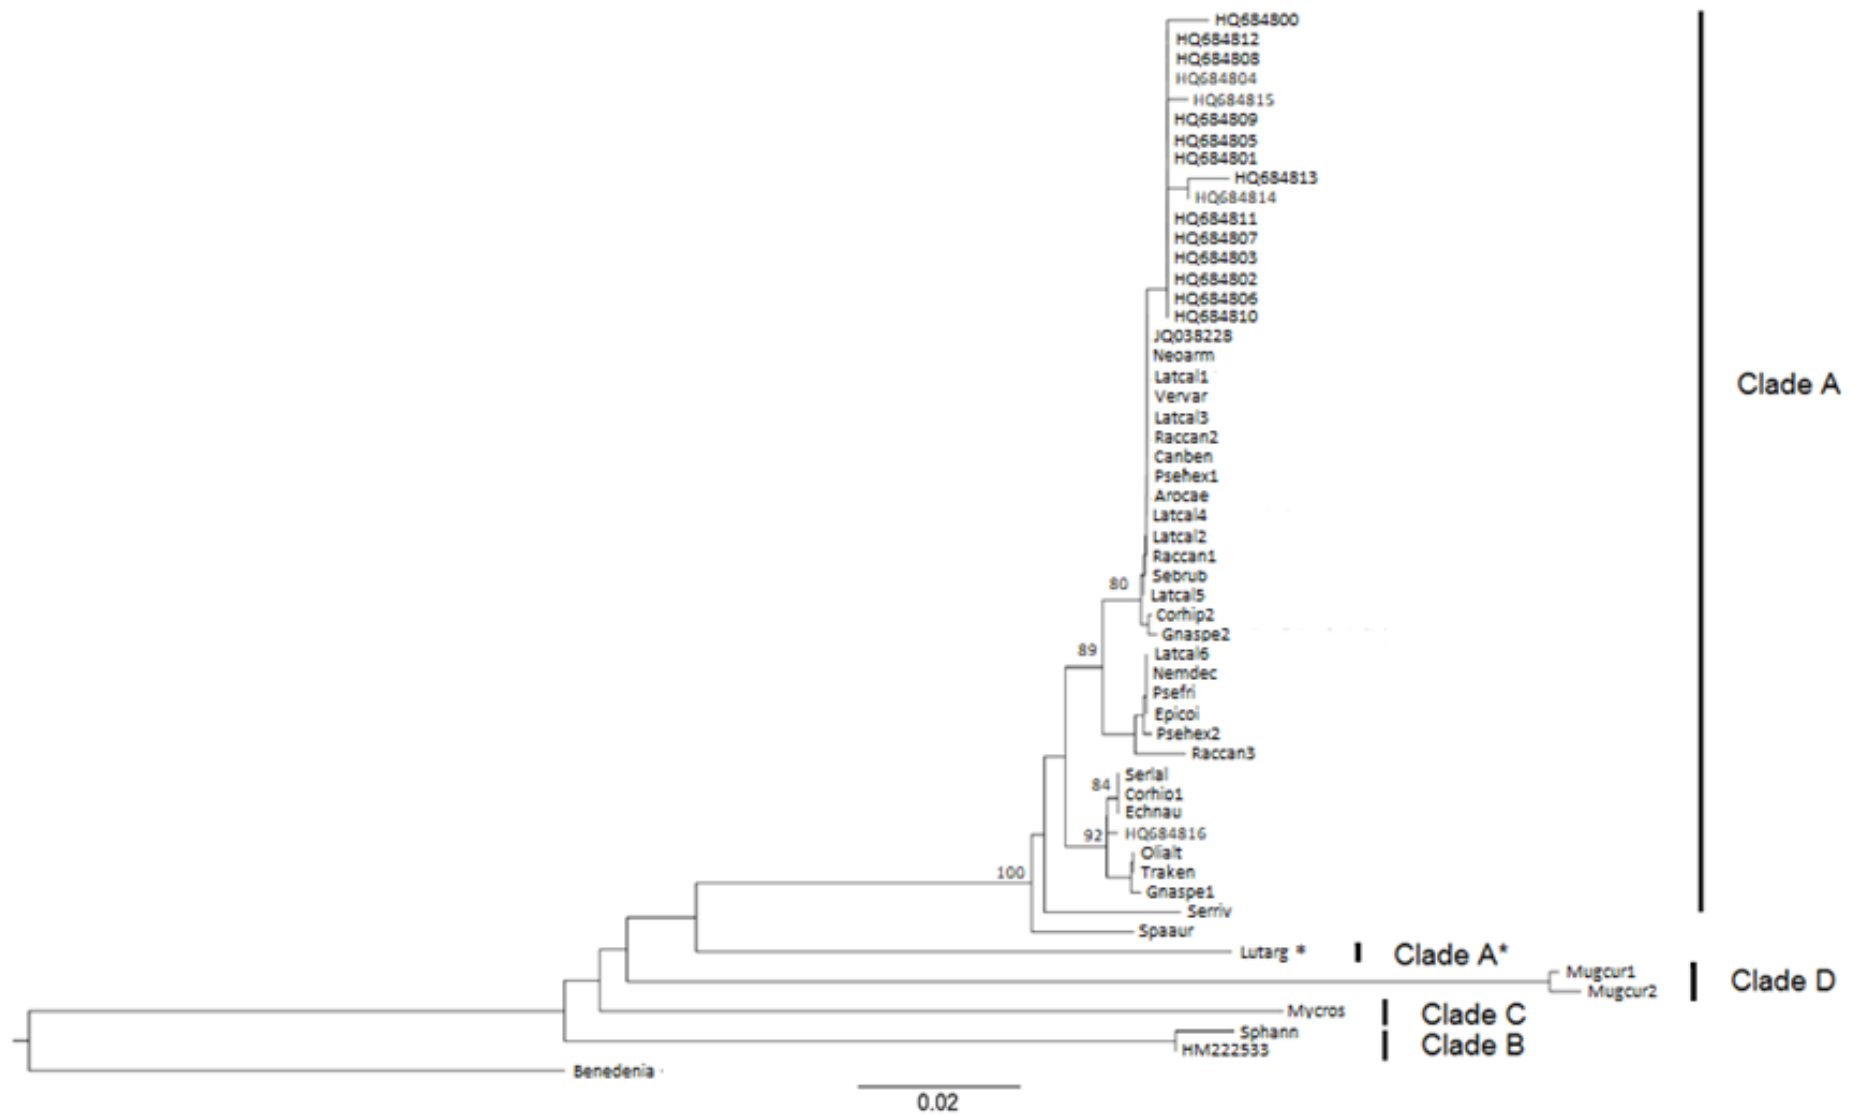

11  
12  
13



14 Fig. 3. Relationships of species of *Neobenedenia* isolates collected from wild and captive host fish based on a Neighbor-joining  
15 analysis of partial *cytochrome b* sequences collected from Genbank and the present study. Genbank samples included in this analysis  
16 are titled using their Genbank identification code and were collected from a variety of host species. “Benedenia” = *Benedenia seriolae*  
17 (FJ972088.1 (*Seriola hippos* – South Australia, Australia)) sequence obtained from Genbank was included as an outgroup. Clades  
18 labelled as per the topology of Figure 1. \* indicates the sample collected from *Lutjanus argentiventris* identified in Clade A in Figure  
19 1.

20 Supplementary Material

21 Table 1: Museum accession numbers for *Neobenedenia* used in this study. XXXX = code forthcoming upon acceptance of the manuscript.

| Host species                           | Figure codes | Museum Accession Code |
|----------------------------------------|--------------|-----------------------|
| <i>Lates calcarifer</i>                | Latcal1      | XXXX                  |
| <i>Lates calcarifer</i>                | Latcal2      | XXXX                  |
| <i>Lates calcarifer</i>                | Latcal3      | XXXX                  |
| <i>Lates calcarifer</i>                | Latcal4      | XXXX                  |
| <i>Lates calcarifer</i>                | Latcal5      | XXXX                  |
| <i>Lates calcarifer</i>                | Latcal6      | XXXX                  |
| <i>Seriola lalandi</i>                 | Serlal       | XXXX                  |
| <i>Trachinotus kennedeyi</i>           | Traken       | XXXX                  |
| <i>Oligoplites altus</i>               | Olialt       | XXXX                  |
| <i>Gnathanodon speciosus</i>           | Gnaspec1     | XXXX                  |
| <i>Gnathanodon speciosus</i>           | Gnaspec2     | XXXX                  |
| <i>Seriola rivoliana</i>               | Serriv       | XXXX                  |
| <i>Rachycentron canadum</i>            | Raccan1      | XXXX                  |
| <i>Rachycentron canadum</i>            | Raccan2      | XXXX                  |
| <i>Rachycentron canadum</i>            | Raccan3      | XXXX                  |
| <i>Mycteroperca rosacea</i>            | Mycros       | XXXX                  |
| <i>Epinephelus coioides</i>            | Epicoi       | XXXX                  |
| <i>Arothron caercae ruleopunctatus</i> | Arocae       | XXXX                  |
| <i>Canthigaster bennetti</i>           | Canben       | XXXX                  |
| <i>Sphoeroides annulatus</i>           | Sphan        | XXXX                  |
| <i>Coryphaena hippurus</i>             | Corhip1      | XXXX                  |
| <i>Coryphaena hippurus</i>             | Corhip2      | XXXX                  |
| <i>Mugil curema</i>                    | Mugcur1      | XXXX                  |
| <i>Mugil curema</i>                    | Mugcur       | XXXX                  |
| <i>Nemateleotris decora</i>            | Nemdec       | XXXX                  |
| <i>Pseudocheilinus hexataenia</i>      | Psehex1      | XXXX                  |
| <i>Pseudocheilinus hexataenia</i>      | Psehex2      | XXXX                  |
| <i>Pseudochromis fridmani</i>          | Psefri       | XXXX                  |
| <i>Verasper variegatus</i>             | Vervar       | XXXX                  |
| <i>Sebastes rubrivinctus</i>           | Sebrub       | XXXX                  |
| <i>Neocirrhites armatus</i>            | Neoarm       | XXXX                  |
| <i>Echeneis naucrates</i>              | Echnau       | XXXX                  |
| <i>Sparus aurata</i>                   | Spaur        | XXXX                  |
| <i>Lutjanus argentiventris</i>         | Lutarg       | XXXX                  |

23 Table 2: Sequences of *Neobenedenia* (identified as “*Neobenedenia melleni*” by researchers) retrieved from Genbank, the lodging  
 24 researchers and associated codes

| Genbank code | Species                     | Host species/species code    | Collection location     | Gene                           | Reference authors                                              |
|--------------|-----------------------------|------------------------------|-------------------------|--------------------------------|----------------------------------------------------------------|
| HQ684800     | <i>Neobenedenia melleni</i> | LsaHZ3                       | China                   | Mitochondrial - Cytochrome b   | Zhang,J., Wu,X.Y., Xie,M.Q.. and Li,A.X.                       |
| HQ684801     | <i>Neobenedenia melleni</i> | SduXM                        | China                   | Mitochondrial - Cytochrome b   | Zhang,J., Wu,X.Y., Xie,M.Q.. and Li,A.X.                       |
| HQ684802     | <i>Neobenedenia melleni</i> | CliGZ2                       | China                   | Mitochondrial - Cytochrome b   | Zhang,J., Wu,X.Y., Xie,M.Q.. and Li,A.X.                       |
| HQ684803     | <i>Neobenedenia melleni</i> | EcoZJ1                       | China                   | Mitochondrial - Cytochrome b   | Zhang,J., Wu,X.Y., Xie,M.Q.. and Li,A.X.                       |
| HQ684805     | <i>Neobenedenia melleni</i> | EchZH                        | China                   | Mitochondrial - Cytochrome b   | Zhang,J., Wu,X.Y., Xie,M.Q.. and Li,A.X.                       |
| HQ684806     | <i>Neobenedenia melleni</i> | LarYJ                        | China                   | Mitochondrial - Cytochrome b   | Zhang,J., Wu,X.Y., Xie,M.Q.. and Li,A.X.                       |
| HQ684807     | <i>Neobenedenia melleni</i> | LstYJ1                       | China                   | Mitochondrial - Cytochrome b   | Zhang,J., Wu,X.Y., Xie,M.Q.. and Li,A.X.                       |
| HQ684808     | <i>Neobenedenia melleni</i> | SduZH2                       | China                   | Mitochondrial - Cytochrome b   | Zhang,J., Wu,X.Y., Xie,M.Q.. and Li,A.X.                       |
| HQ684809     | <i>Neobenedenia melleni</i> | SduZH1                       | China                   | Mitochondrial - Cytochrome b   | Zhang,J., Wu,X.Y., Xie,M.Q.. and Li,A.X.                       |
| HQ684810     | <i>Neobenedenia melleni</i> | LsaZJ1                       | China                   | Mitochondrial - Cytochrome b   | Zhang,J., Wu,X.Y., Xie,M.Q.. and Li,A.X.                       |
| HQ684811     | <i>Neobenedenia melleni</i> | CliGZ1                       | China                   | Mitochondrial - Cytochrome b   | Zhang,J., Wu,X.Y., Xie,M.Q.. and Li,A.X.                       |
| HQ684812     | <i>Neobenedenia melleni</i> | PciYJ1                       | China                   | Mitochondrial - Cytochrome b   | Zhang,J., Wu,X.Y., Xie,M.Q.. and Li,A.X.                       |
| HQ684813     | <i>Neobenedenia melleni</i> | TblHD1                       | China                   | Mitochondrial - Cytochrome b   | Zhang,J., Wu,X.Y., Xie,M.Q.. and Li,A.X.                       |
| HQ684814     | <i>Neobenedenia melleni</i> | PciZJ2                       | China                   | Mitochondrial - Cytochrome b   | Zhang,J., Wu,X.Y., Xie,M.Q.. and Li,A.X.                       |
| HQ684815     | <i>Neobenedenia melleni</i> | EmoJAP1                      | China                   | Mitochondrial - Cytochrome b   | Zhang,J., Wu,X.Y., Xie,M.Q.. and Li,A.X.                       |
| HQ684816     | <i>Neobenedenia melleni</i> | EmoJAP2                      | China                   | Mitochondrial - Cytochrome b   | Zhang,J., Wu,X.Y., Xie,M.Q.. and Li,A.X.                       |
| JQ038228     | <i>Neobenedenia melleni</i> | <i>Seriola dumerili</i>      | China – Fujian Province | Mitochondrial – partial genome | Zhang,J., Wu,X.Y., Xie,M.Q.. and Li,A.X.                       |
| HM222533     | <i>Neobenedenia</i> sp.     | <i>Sphoeroides annulatus</i> | Mexico – La Paz         | Mitochondrial - Cytochrome b   | Perkins,E.M., Donnellan,S.C., Bertozzi,T. and Whittington,I.D. |

25

26

27

28 Table 3: Proportion of informative sites of three genes; 28S, H3, and cytochrome b for sequences included in analyses.

| Gene         | Length | Parsimony informative sites |
|--------------|--------|-----------------------------|
| 28S          | 411    | 24                          |
| H3           | 292    | 26                          |
| Cytochrome b | 704    | 166                         |

29
